# Supplementary material for: Phthalate pollution: environmental fate and cumulative human exposure index using the multivariate analysis approach
Source: Royal Society of Chemistry journal article supplement (doi:10.1039/d0em00396d), 2021-01-01
Supplement: d0em00396d1.xlsx [file d0em00396d1.xlsx]

## Sheet: Sheet1
Phthalate exposure index (PEI) and Average phthalate pollution index (PPI)
China		Surface water	Wastewater	Drinking water	Sludge	Sediments	Air gas phase	Air particulate phase	Air dust phase	Milk and drinks	Foods	Freshwater fish	Total
	Weightage	10	2	20	3	3	5	5	2	20	20	10	100
	Relative weightage	0.095	0.019	0.19	0.0285	0.0285	0.0475	0.0475	0.019	0.19	0.19	0.095
	PPI	11.1732	0.59854	0.00229246	290.953	36.56	1003.44	843.673	7758.04	0.420539	11.3624	155.311	919.23
	Subindex_PEI	1.06145	0.0113723	0.000435567	8.29216	1.04196	47.6636	40.0744	147.403	0.0799024	2.15886	14.7545	262.541
France		Surface water	Wastewater	Drinking water	Sludge	Sediments	Air gas phase	Air particulate phase	Air dust phase	Milk and drinks	Foods	Freshwater fish	Total
	Weightage	10	2	20	3	3	5	5	2	20	20	10	100
	Relative weightage	0.095	0.019	0.19	0.0285	0.0285	0.0475	0.0475	0.019	0.19	0.19	0.095
	PPI	0.0502316	0.352231	0	4.61937	83.1289	1906.85	282.054	2340.53	0.00614243	49.8573	76.3073	431.25
	Subindex_PEI	0.004772	0.00669239	0	0.131652	2.36917	90.5752	13.3975	44.47	0.00116706	9.47289	7.24919	167.678
Germany		Surface water	Wastewater	Drinking water	Sludge	Sediments	Air gas phase	Air particulate phase	Air dust phase	Milk and drinks	Foods	Freshwater fish	Total
	Weightage	10	2	20	3	3	5	5	2	20	20	10	100
	Relative weightage	0.095	0.019	0.19	0.0285	0.0285	0.0475	0.0475	0.019	0.19	0.19	0.095
	PPI	0.967676	0.185569	0.0162122	399.127	29.4938	4096.64	282.054	2126.64	0.0852361	49.8573	155.311	649.125
	Subindex_PEI	0.0919292	0.00352581	0.00308031	11.3751	0.840574	194.591	13.3975	40.4061	0.0161949	9.47289	14.7545	284.952
Italy		Surface water	Wastewater	Drinking water	Sludge	Sediments	Air gas phase	Air particulate phase	Air dust phase	Milk and drinks	Foods	Freshwater fish	Total
	Weightage	10	2	20	3	3	5	5	2	20	20	10	100
	Relative weightage	0.095	0.019	0.19	0.0285	0.0285	0.0475	0.0475	0.019	0.19	0.19	0.095
	PPI	0.69315	0.59854	0.0137121	1691.94	83.1289	1906.85	282.054	1812.5	0.992494	49.8573	155.311	543.994
	Subindex_PEI	0.0658492	0.0113723	0.0026053	48.2204	2.36917	90.5752	13.3975	34.4375	0.188574	9.47289	14.7545	213.496
Japan		Surface water	Wastewater	Drinking water	Sludge	Sediments	Air gas phase	Air particulate phase	Air dust phase	Milk and drinks	Foods	Freshwater fish	Total
	Weightage	10	2	20	3	3	5	5	2	20	20	10	100
	Relative weightage	0.095	0.019	0.19	0.0285	0.0285	0.0475	0.0475	0.019	0.19	0.19	0.095
	PPI	0.428928	0.59854	0.0137121	1691.94	83.1289	1906.85	282.054	7370.11	0.533805	49.8573	155.311	1049.17
	Subindex_PEI	0.0407482	0.0113723	0.0026053	48.2204	2.36917	90.5752	13.3975	140.032	0.101423	9.47289	14.7545	318.978
Jordanian		Surface water	Wastewater	Drinking water	Sludge	Sediments	Air gas phase	Air particulate phase	Air dust phase	Milk and drinks	Foods	Freshwater fish	Total
	Weightage	10	2	20	3	3	5	5	2	20	20	10	100
	Relative weightage	0.095	0.019	0.19	0.0285	0.0285	0.0475	0.0475	0.019	0.19	0.19	0.095
	PPI	0.403073	0.59854	0.0137121	1691.94	83.1289	1906.85	282.054	7370.11	0.533805	49.8573	155.311	1049.16
	Subindex_PEI	0.038292	0.0113723	0.0026053	48.2204	2.36917	90.5752	13.3975	140.032	0.101423	9.47289	14.7545	318.975
Malaysia		Surface water	Wastewater	Drinking water	Sludge	Sediments	Air gas phase	Air particulate phase	Air dust phase	Milk and drinks	Foods	Freshwater fish	Total
	Weightage	10	2	20	3	3	5	5	2	20	20	10	100
	Relative weightage	0.095	0.019	0.19	0.0285	0.0285	0.0475	0.0475	0.019	0.19	0.19	0.095
	PPI	0.324339	0.59854	0.0137121	1691.94	83.1289	1906.85	282.054	7370.11	0.533805	49.8573	155.311	1049.16
	Subindex_PEI	0.0308122	0.0113723	0.0026053	48.2204	2.36917	90.5752	13.3975	140.032	0.101423	9.47289	14.7545	318.968
Mexico		Surface water	Wastewater	Drinking water	Sludge	Sediments	Air gas phase	Air particulate phase	Air dust phase	Milk and drinks	Foods	Freshwater fish	Total
	Weightage	10	2	20	3	3	5	5	2	20	20	10	100
	Relative weightage	0.095	0.019	0.19	0.0285	0.0285	0.0475	0.0475	0.019	0.19	0.19	0.095
	PPI	19.0661	0.59854	0.0137121	1691.94	1.93679	82.9508	282.054	7370.11	0.533805	49.8573	155.311	877.671
	Subindex_PEI	1.81128	0.0113723	0.0026053	48.2204	0.0551985	3.94016	13.3975	140.032	0.101423	9.47289	14.7545	231.799
Netherlands		Surface water	Wastewater	Drinking water	Sludge	Sediments	Air gas phase	Air particulate phase	Air dust phase	Milk and drinks	Foods	Freshwater fish	Total
	Weightage	10	2	20	3	3	5	5	2	20	20	10	100
	Relative weightage	0.095	0.019	0.19	0.0285	0.0285	0.0475	0.0475	0.019	0.19	0.19	0.095
	PPI	0.0670967	1.27271	0.0137121	1691.94	83.1289	1906.85	282.054	7370.11	0.533805	49.8573	155.311	1049.19
	Subindex_PEI	0.00637418	0.0241815	0.0026053	48.2204	2.36917	90.5752	13.3975	140.032	0.101423	9.47289	14.7545	318.956
Nigeria		Surface water	Wastewater	Drinking water	Sludge	Sediments	Air gas phase	Air particulate phase	Air dust phase	Milk and drinks	Foods	Freshwater fish	Total
	Weightage	10	2	20	3	3	5	5	2	20	20	10	100
	Relative weightage	0.095	0.019	0.19	0.0285	0.0285	0.0475	0.0475	0.019	0.19	0.19	0.095
	PPI	17778.2	0.59854	13837.6	1977.39	83.1289	1906.85	282.054	7370.11	0.533805	49.8573	61.6145	3940.72
	Subindex_PEI	1688.93	0.0113723	2629.14	56.3555	2.36917	90.5752	13.3975	140.032	0.101423	9.47289	5.85337	4636.24
SaudiArabia		Surface water	Wastewater	Drinking water	Sludge	Sediments	Air gas phase	Air particulate phase	Air dust phase	Milk and drinks	Foods	Freshwater fish	Total
	Weightage	10	2	20	3	3	5	5	2	20	20	10	100
	Relative weightage	0.095	0.019	0.19	0.0285	0.0285	0.0475	0.0475	0.019	0.19	0.19	0.095
	PPI	0.623895	0.59854	0.0137121	1691.94	83.1289	1906.85	282.054	7370.11	0.533805	49.8573	155.311	1049.18
	Subindex_PEI	0.0592701	0.0113723	0.0026053	48.2204	2.36917	90.5752	13.3975	140.032	0.101423	9.47289	14.7545	318.996
South Africa		Surface water	Wastewater	Drinking water	Sludge	Sediments	Air gas phase	Air particulate phase	Air dust phase	Milk and drinks	Foods	Freshwater fish	Total
	Weightage	10	2	20	3	3	5	5	2	20	20	10	100
	Relative weightage	0.095	0.019	0.19	0.0285	0.0285	0.0475	0.0475	0.019	0.19	0.19	0.095
	PPI	191.232	0.59854	0.0137121	1691.94	19.2115	1906.85	282.054	7370.11	0.533805	49.8573	155.311	1060.7
	Subindex_PEI	18.1671	0.0113723	0.0026053	48.2204	0.547528	90.5752	13.3975	140.032	0.101423	9.47289	14.7545	335.283
Taiwan		Surface water	Wastewater	Drinking water	Sludge	Sediments	Air gas phase	Air particulate phase	Air dust phase	Milk and drinks	Foods	Freshwater fish	Total
	Weightage	10	2	20	3	3	5	5	2	20	20	10	100
	Relative weightage	0.095	0.019	0.19	0.0285	0.0285	0.0475	0.0475	0.019	0.19	0.19	0.095
	PPI	19.1794	0.59854	0.00222214	1691.94	328.443	1906.85	282.054	7370.11	0.533805	49.8573	434.465	1098.55
	Subindex_PEI	1.82204	0.0113723	0.000422207	48.2204	9.36061	90.5752	13.3975	140.032	0.101423	9.47289	41.2742	354.268
U.K.		Surface water	Wastewater	Drinking water	Sludge	Sediments	Air gas phase	Air particulate phase	Air dust phase	Milk and drinks	Foods	Freshwater fish	Total
	Weightage	10	2	20	3	3	5	5	2	20	20	10	100
	Relative weightage	0.095	0.019	0.19	0.0285	0.0285	0.0475	0.0475	0.019	0.19	0.19	0.095
	PPI	18.7458	0.450035	0.0137121	1691.94	83.1289	1906.85	282.054	2232.12	0.533805	49.8573	155.311	583.728
	Subindex_PEI	1.78086	0.00855066	0.0026053	48.2204	2.36917	90.5752	13.3975	42.4104	0.101423	9.47289	14.7545	223.093
Australia		Surface water	Wastewater	Drinking water	Sludge	Sediments	Air gas phase	Air particulate phase	Air dust phase	Milk and drinks	Foods	Freshwater fish	Total
	Weightage	10	2	20	3	3	5	5	2	20	20	10	100
	Relative weightage	0.095	0.019	0.19	0.0285	0.0285	0.0475	0.0475	0.019	0.19	0.19	0.095
	PPI	20.3514	0.0326586	0.0137121	1691.94	83.1289	1906.85	282.054	7370.11	0.533805	49.8573	155.311	1050.93
	Subindex_PEI	1.93338	0.000620514	0.0026053	48.2204	2.36917	90.5752	13.3975	140.032	0.101423	9.47289	14.7545	320.86
Finland		Surface water	Wastewater	Drinking water	Sludge	Sediments	Air gas phase	Air particulate phase	Air dust phase	Milk and drinks	Foods	Freshwater fish	Total
	Weightage	10	2	20	3	3	5	5	2	20	20	10	100
	Relative weightage	0.095	0.019	0.19	0.0285	0.0285	0.0475	0.0475	0.019	0.19	0.19	0.095
	PPI	20.3514	1.29804	0.0137121	42.2222	83.1289	1906.85	282.054	7370.11	0.533805	49.8573	155.311	901.066
	Subindex_PEI	1.93338	0.0246627	0.0026053	1.20333	2.36917	90.5752	13.3975	140.032	0.101423	9.47289	14.7545	273.867
Greece		Surface water	Wastewater	Drinking water	Sludge	Sediments	Air gas phase	Air particulate phase	Air dust phase	Milk and drinks	Foods	Freshwater fish	Total
	Weightage	10	2	20	3	3	5	5	2	20	20	10	100
	Relative weightage	0.095	0.019	0.19	0.0285	0.0285	0.0475	0.0475	0.019	0.19	0.19	0.095
	PPI	20.3514	0.59854	0.044158	1691.94	83.1289	1906.85	282.054	7370.11	0.533805	49.8573	155.311	1050.98
	Subindex_PEI	1.93338	0.0113723	0.00839002	48.2204	2.36917	90.5752	13.3975	140.032	0.101423	9.47289	14.7545	320.876
India		Surface water	Wastewater	Drinking water	Sludge	Sediments	Air gas phase	Air particulate phase	Air dust phase	Milk and drinks	Foods	Freshwater fish	Total
	Weightage	10	2	20	3	3	5	5	2	20	20	10	100
	Relative weightage	0.095	0.019	0.19	0.0285	0.0285	0.0475	0.0475	0.019	0.19	0.19	0.095
	PPI	20.3514	0.59854	0.00681127	1691.94	83.1289	1906.85	282.054	7370.11	0.533805	49.8573	155.311	1050.98
	Subindex_PEI	1.93338	0.0113723	0.00129414	48.2204	2.36917	90.5752	13.3975	140.032	0.101423	9.47289	14.7545	320.869
Czech Republic		Surface water	Wastewater	Drinking water	Sludge	Sediments	Air gas phase	Air particulate phase	Air dust phase	Milk and drinks	Foods	Freshwater fish	Total
	Weightage	10	2	20	3	3	5	5	2	20	20	10	100
	Relative weightage	0.095	0.019	0.19	0.0285	0.0285	0.0475	0.0475	0.019	0.19	0.19	0.095
	PPI	20.3514	0.59854	0.00609275	1691.94	83.1289	1906.85	282.054	7370.11	0.533805	49.8573	155.311	1050.98
	Subindex_PEI	1.93338	0.0113723	0.00115762	48.2204	2.36917	90.5752	13.3975	140.032	0.101423	9.47289	14.7545	320.869
Portugal		Surface water	Wastewater	Drinking water	Sludge	Sediments	Air gas phase	Air particulate phase	Air dust phase	Milk and drinks	Foods	Freshwater fish	Total
	Weightage	10	2	20	3	3	5	5	2	20	20	10	100
	Relative weightage	0.095	0.019	0.19	0.0285	0.0285	0.0475	0.0475	0.019	0.19	0.19	0.095
	PPI	20.3514	0.59854	0.0184617	1691.94	83.1289	1906.85	282.054	7370.11	0.533805	49.8573	155.311	1050.98
	Subindex_PEI	1.93338	0.0113723	0.00350772	48.2204	2.36917	90.5752	13.3975	140.032	0.101423	9.47289	14.7545	320.871
Poland		Surface water	Wastewater	Drinking water	Sludge	Sediments	Air gas phase	Air particulate phase	Air dust phase	Milk and drinks	Foods	Freshwater fish	Total
	Weightage	10	2	20	3	3	5	5	2	20	20	10	100
	Relative weightage	0.095	0.019	0.19	0.0285	0.0285	0.0475	0.0475	0.019	0.19	0.19	0.095
	PPI	20.3514	0.59854	0.0271583	1691.94	83.1289	1906.85	282.054	7370.11	0.533805	49.8573	155.311	1050.98
	Subindex_PEI	1.93338	0.0113723	0.00516007	48.2204	2.36917	90.5752	13.3975	140.032	0.101423	9.47289	14.7545	320.873
Canada		Surface water	Wastewater	Drinking water	Sludge	Sediments	Air gas phase	Air particulate phase	Air dust phase	Milk and drinks	Foods	Freshwater fish	Total
	Weightage	10	2	20	3	3	5	5	2	20	20	10	100
	Relative weightage	0.095	0.019	0.19	0.0285	0.0285	0.0475	0.0475	0.019	0.19	0.19	0.095
	PPI	20.3514	0.59854	0.0137121	9086.72	83.1289	1906.85	282.054	7370.11	0.742073	49.8573	155.311	1723.25
	Subindex_PEI	1.93338	0.0113723	0.0026053	258.971	2.36917	90.5752	13.3975	140.032	0.140994	9.47289	14.7545	531.661
Morocco		Surface water	Wastewater	Drinking water	Sludge	Sediments	Air gas phase	Air particulate phase	Air dust phase	Milk and drinks	Foods	Freshwater fish	Total
	Weightage	10	2	20	3	3	5	5	2	20	20	10	100
	Relative weightage	0.095	0.019	0.19	0.0285	0.0285	0.0475	0.0475	0.019	0.19	0.19	0.095
	PPI	20.3514	0.59854	0.0137121	43.3312	83.1289	1906.85	282.054	7370.11	0.533805	49.8573	155.311	901.103
	Subindex_PEI	1.93338	0.0113723	0.0026053	1.23494	2.36917	90.5752	13.3975	140.032	0.101423	9.47289	14.7545	273.885
Spain		Surface water	Wastewater	Drinking water	Sludge	Sediments	Air gas phase	Air particulate phase	Air dust phase	Milk and drinks	Foods	Freshwater fish	Total
	Weightage	10	2	20	3	3	5	5	2	20	20	10	100
	Relative weightage	0.095	0.019	0.19	0.0285	0.0285	0.0475	0.0475	0.019	0.19	0.19	0.095
	PPI	20.3514	0.59854	0.0137121	1691.94	83.1289	1898.2	282.054	3356.68	0.229187	49.8573	155.311	685.307
	Subindex_PEI	1.93338	0.0113723	0.0026053	48.2204	2.36917	90.1647	13.3975	63.777	0.0435456	9.47289	14.7545	244.147
Sweden		Surface water	Wastewater	Drinking water	Sludge	Sediments	Air gas phase	Air particulate phase	Air dust phase	Milk and drinks	Foods	Freshwater fish	Total
	Weightage	10	2	20	3	3	5	5	2	20	20	10	100
	Relative weightage	0.095	0.019	0.19	0.0285	0.0285	0.0475	0.0475	0.019	0.19	0.19	0.095
	PPI	20.3514	0.59854	0.0137121	1691.94	83.1289	2452.98	282.054	7152.61	1.04268	88.3522	155.311	1084.4
	Subindex_PEI	1.93338	0.0113723	0.0026053	48.2204	2.36917	116.517	13.3975	135.9	0.19811	16.7869	14.7545	350.09
Belgium		Surface water	Wastewater	Drinking water	Sludge	Sediments	Air gas phase	Air particulate phase	Air dust phase	Milk and drinks	Foods	Freshwater fish	Total
	Weightage	10	2	20	3	3	5	5	2	20	20	10	100
	Relative weightage	0.095	0.019	0.19	0.0285	0.0285	0.0475	0.0475	0.019	0.19	0.19	0.095
	PPI	20.3514	0.59854	0.0137121	1691.94	83.1289	1906.85	282.054	1376.21	0.533805	49.8573	155.311	506.077
	Subindex_PEI	1.93338	0.0113723	0.0026053	48.2204	2.36917	90.5752	13.3975	26.1481	0.101423	9.47289	14.7545	206.986
Slovakia		Surface water	Wastewater	Drinking water	Sludge	Sediments	Air gas phase	Air particulate phase	Air dust phase	Milk and drinks	Foods	Freshwater fish	Total
	Weightage	10	2	20	3	3	5	5	2	20	20	10	100
	Relative weightage	0.095	0.019	0.19	0.0285	0.0285	0.0475	0.0475	0.019	0.19	0.19	0.095
	PPI	20.3514	0.59854	0.0137121	1691.94	83.1289	1906.85	282.054	43450.5	0.533805	49.8573	155.311	4331.01
	Subindex_PEI	1.93338	0.0113723	0.0026053	48.2204	2.36917	90.5752	13.3975	825.56	0.101423	9.47289	14.7545	1006.4
USA		Surface water	Wastewater	Drinking water	Sludge	Sediments	Air gas phase	Air particulate phase	Air dust phase	Milk and drinks	Foods	Freshwater fish	Total
	Weightage	10	2	20	3	3	5	5	2	20	20	10	100
	Relative weightage	0.095	0.019	0.19	0.0285	0.0285	0.0475	0.0475	0.019	0.19	0.19	0.095
	PPI	20.3514	0.59854	0.0137121	1691.94	83.1289	1906.85	282.054	2095.27	0.533805	49.8573	155.311	571.446
	Subindex_PEI	1.93338	0.0113723	0.0026053	48.2204	2.36917	90.5752	13.3975	39.8102	0.101423	9.47289	14.7545	220.649
South Korea		Surface water	Wastewater	Drinking water	Sludge	Sediments	Air gas phase	Air particulate phase	Air dust phase	Milk and drinks	Foods	Freshwater fish	Total
	Weightage	10	2	20	3	3	5	5	2	20	20	10	100
	Relative weightage	0.095	0.019	0.19	0.0285	0.0285	0.0475	0.0475	0.019	0.19	0.19	0.095
	PPI	20.3514	0.59854	0.0137121	1691.94	83.1289	1906.85	282.054	7370.11	0.752083	49.8573	155.311	1051
	Subindex_PEI	1.93338	0.0113723	0.0026053	48.2204	2.36917	90.5752	13.3975	140.032	0.142896	9.47289	14.7545	320.912
Hong-Kong		Surface water	Wastewater	Drinking water	Sludge	Sediments	Air gas phase	Air particulate phase	Air dust phase	Milk and drinks	Foods	Freshwater fish	Total
	Weightage	10	2	20	3	3	5	5	2	20	20	10	100
	Relative weightage	0.095	0.019	0.19	0.0285	0.0285	0.0475	0.0475	0.019	0.19	0.19	0.095
	PPI	20.3514	0.59854	0.0137121	1691.94	83.1289	1906.85	282.054	7370.11	0.533805	49.8573	48.8557	1041.3
	Subindex_PEI	1.93338	0.0113723	0.0026053	48.2204	2.36917	90.5752	13.3975	140.032	0.101423	9.47289	4.6413	310.757
World		Surface water	Wastewater	Drinking water	Sludge	Sediments	Air gas phase	Air particulate phase	Air dust phase	Milk and drinks	Foods	Freshwater fish	Total
	Weightage	10	2	20	3	3	5	5	2	20	20	10	100
	Relative weightage	0.095	0.019	0.19	0.0285	0.0285	0.0475	0.0475	0.019	0.19	0.19	0.095
	PPI	20.3514	0.59854	0.0137121	1691.94	83.1289	1906.85	282.054	7370.11	0.533805	49.8573	155.311	1050.98
	Subindex_PEI	1.93338	0.0113723	0.0026053	48.2204	2.36917	90.5752	13.3975	140.032	0.101423	9.47289	14.7545	320.871
