# Supplementary material for: Phthalate pollution: environmental fate and cumulative human exposure index using the multivariate analysis approach
Source: Royal Society of Chemistry journal article supplement (doi:10.1039/d0em00396d), 2021-01-01
Supplement: d0em00396d2.xlsx [file d0em00396d2.xlsx]

## Sheet: PPI
Surface water (micro g/L)								Waste water (micro g/L)								Drinking water (n g/L)								Sludge (mg/kg dw)								Sediment (µg/kg dw)								Air gas phase (ng/m3)									Air particulate phase (ng/m3)
China	PAEs	Weightage	Relative weightage	Concentration	EQS (ppb)	Quality Rating	Sub Index	China	PAEs	Weightage	Relative weightage	Concentration	EQS (ppb)	Quality Rating	Sub Index	China	PAEs	Weightage	Relative weightage	Concentration	EQS (ppb)	Quality Rating	Sub Index	China	PAEs	Weightage	Relative weightage	Concentration	EQS (ppb)	Quality Rating	Sub Index	China	PAEs	Weightage	Relative weightage	Concentration	EQS (ppb)	Quality Rating	Sub Index	China	PAEs	Molecular weight	Weightage	Relative weightage	Concentration	EQS (ppb)	Quality Rating	Sub Index	China
	DMP	3	0.158333	0.523667	800	0.000654583	0.000103642		DMP	3	0.158333	0.586875	800	0.000733594	0.000116152		DMP	3	0.158333	11.8	800	1.475e-05	2.33542e-06		DMP	3	0.158333	6.5775	800	8.22188	1.3018		DMP	3	0.158333	64.8	800	0.081	0.012825		DMP	194.18	3	0.158333	501	800	78.8537	12.4852
	DEP	3	0.158333	0.268588	200	0.00134294	0.000212632		DEP	3	0.158333	18.5739	200	0.0928693	0.0147043		DEP	3	0.158333	39.45	200	0.00019725	3.12313e-05		DEP	3	0.158333	1.915	200	9.575	1.51604		DEP	3	0.158333	90.775	200	0.453875	0.0718635		DEP	222.24	3	0.158333	836.117	200	459.932	72.8225
	DBP	4	0.211111	238.536	5	47.7072	10.0715		DBP	4	0.211111	3.44078	5	0.688157	0.145278		DBP	4	0.211111	53.5	5	0.0107	0.00225889		DBP	4	0.211111	6.82425	5	1364.85	288.135		DBP	4	0.211111	283.525	5	56.705	11.9711		DBP	278.34	4	0.211111	247.55	5	4349.07	918.137
	BBP	3	0.158333	0.537667	20	0.0268833	0.00425653		BBP	3	0.158333	3.16826	20	0.158413	0.0250821		BBP	3	0.158333		20	0	0		BBP	3	0.158333		20	0	0		BBP	3	0.158333	84.525	20	4.22625	0.669156		BBP	312.4	3	0.158333		20	0	0
	DEHP	5	0.263889	83.1475	20	4.15737	1.09708		DEHP	5	0.263889	31.3283	20	1.56642	0.41336		DEHP	5	0.263889		20	0	0		DEHP	5	0.263889		20	0	0		DEHP	5	0.263889	1806.45	20	90.3225	23.8351		DEHP	390.564	5	0.263889		20	0	0
		18					11.1732			18					0.59854			18					0.00229246			18					290.953			18					36.56				18					1003.44
France	PAEs	Weightage	Relative weightage	Concentration	EQS (ppb)	Quality Rating	Sub Index	France	PAEs	Weightage	Relative weightage	Concentration	EQS (ppb)	Quality Rating	Sub Index	France	PAEs	Weightage	Relative weightage	Concentration	EQS (ppb)	Quality Rating	Sub Index	France	PAEs	Weightage	Relative weightage	Concentration	EQS (ppb)	Quality Rating	Sub Index	France	PAEs	Weightage	Relative weightage	Concentration	EQS (ppb)	Quality Rating	Sub Index	France	PAEs	Molecular weight	Weightage	Relative weightage	Concentration	EQS (ppb)	Quality Rating	Sub Index	France
	DMP	3	0.158333	0.0624667	800	7.80833e-05	1.23632e-05		DMP	3	0.158333	0.5875	800	0.000734375	0.000116276		DMP	3	0.158333	0	800	0	0		DMP	3	0.158333	2.7	800	3.375	0.534375		DMP	3	0.158333	32.4	800	0.0405	0.0064125		DMP	194.18	3	0.158333	361.775	800	56.9407	9.01561
	DEP	3	0.158333	1.03413	200	0.00517067	0.000818689		DEP	3	0.158333	4.26	200	0.0213	0.0033725		DEP	3	0.158333	0	200	0	0		DEP	3	0.158333	0.36	200	1.8	0.285		DEP	3	0.158333	157.967	200	0.789833	0.125057		DEP	222.24	3	0.158333	836.117	200	459.932	72.8225
	DBP	4	0.211111	0.5022	5	0.10044	0.021204		DBP	4	0.211111	1.38	5	0.276	0.0582667		DBP	4	0.211111	0	5	0	0		DBP	4	0.211111	0.09	5	18	3.8		DBP	4	0.211111	1483.95	5	296.79	62.6558		DBP	278.34	4	0.211111	492.062	5	8644.77	1825.01
	BBP	3	0.158333	0	20	0	0		BBP	3	0.158333	1.375	20	0.06875	0.0108854		BBP	3	0.158333		20	0	0		BBP	3	0.158333		20	0	0		BBP	3	0.158333	142.262	20	7.11312	1.12624		BBP	312.4	3	0.158333		20	0	0
	DEHP	5	0.263889	2.137	20	0.10685	0.0281965		DEHP	5	0.263889	21.19	20	1.0595	0.27959		DEHP	5	0.263889		20	0	0		DEHP	5	0.263889		20	0	0		DEHP	5	0.263889	1456.33	20	72.8165	19.2155		DEHP	390.564	5	0.263889		20	0	0
		18					0.0502316			18					0.352231			18					0			18					4.61937			18					83.1289				18					1906.85
Germany	PAEs	Weightage	Relative weightage	Concentration	EQS (ppb)	Quality Rating	Sub Index	Germany	PAEs	Weightage	Relative weightage	Concentration	EQS (ppb)	Quality Rating	Sub Index	Germany	PAEs	Weightage	Relative weightage	Concentration	EQS (ppb)	Quality Rating	Sub Index	Germany	PAEs	Weightage	Relative weightage	Concentration	EQS (ppb)	Quality Rating	Sub Index	Germany	PAEs	Weightage	Relative weightage	Concentration	EQS (ppb)	Quality Rating	Sub Index	Germany	PAEs	Molecular weight	Weightage	Relative weightage	Concentration	EQS (ppb)	Quality Rating	Sub Index	Germany
	DMP	3	0.158333	1.01814	800	0.00127268	0.000201507		DMP	3	0.158333	0.586875	800	0.000733594	0.000116152		DMP	3	0.158333	47.4786	800	5.93482e-05	9.3968e-06		DMP	3	0.158333	0	800	0	0		DMP	3	0.158333	32.4	800	0.0405	0.0064125		DMP	194.18	3	0.158333	919	800	144.644	22.9019
	DEP	3	0.158333	449.199	200	2.24599	0.355616		DEP	3	0.158333	18.5739	200	0.0928693	0.0147043		DEP	3	0.158333	200	200	0.001	0.000158333		DEP	3	0.158333	0	200	0	0		DEP	3	0.158333	157.967	200	0.789833	0.125057		DEP	222.24	3	0.158333	722.7	200	397.544	62.9444
	DBP	4	0.211111	3.14	5	0.628	0.132578		DBP	4	0.211111	0.7	5	0.14	0.0295556		DBP	4	0.211111	380	5	0.076	0.0160444		DBP	4	0.211111	9.453	5	1890.6	399.127		DBP	4	0.211111	450	5	90	19		DBP	278.34	4	0.211111	1081.4	5	18998.5	4010.8
	BBP	3	0.158333	4.76293	20	0.238146	0.0377065		BBP	3	0.158333	3.16826	20	0.158413	0.0250821		BBP	3	0.158333		20	0	0		BBP	3	0.158333		20	0	0		BBP	3	0.158333	142.262	20	7.11312	1.12624		BBP	312.4	3	0.158333		20	0	0
	DEHP	5	0.263889	33.4667	20	1.67333	0.441574		DEHP	5	0.263889	8.8	20	0.44	0.116111		DEHP	5	0.263889		20	0	0		DEHP	5	0.263889		20	0	0		DEHP	5	0.263889	700	20	35	9.23611		DEHP	390.564	5	0.263889		20	0	0
		18					0.967676			18					0.185569			18					0.0162122			18					399.127			18					29.4938				18					4096.64
Italy	PAEs	Weightage	Relative weightage	Concentration	EQS (ppb)	Quality Rating	Sub Index	Italy	PAEs	Weightage	Relative weightage	Concentration	EQS (ppb)	Quality Rating	Sub Index	Italy	PAEs	Weightage	Relative weightage	Concentration	EQS (ppb)	Quality Rating	Sub Index	Italy	PAEs	Weightage	Relative weightage	Concentration	EQS (ppb)	Quality Rating	Sub Index	Italy	PAEs	Weightage	Relative weightage	Concentration	EQS (ppb)	Quality Rating	Sub Index	Italy	PAEs	Molecular weight	Weightage	Relative weightage	Concentration	EQS (ppb)	Quality Rating	Sub Index	Italy
	DMP	3	0.158333	0.012	800	1.5e-05	2.375e-06		DMP	3	0.158333	0.586875	800	0.000733594	0.000116152		DMP	3	0.158333	47.4786	800	5.93482e-05	9.3968e-06		DMP	3	0.158333	5.59458	800	6.99323	1.10726		DMP	3	0.158333	32.4	800	0.0405	0.0064125		DMP	194.18	3	0.158333	361.775	800	56.9407	9.01561
	DEP	3	0.158333	0.01	200	5e-05	7.91667e-06		DEP	3	0.158333	18.5739	200	0.0928693	0.0147043		DEP	3	0.158333	106.259	200	0.000531295	8.41217e-05		DEP	3	0.158333	4.55917	200	22.7958	3.60934		DEP	3	0.158333	157.967	200	0.789833	0.125057		DEP	222.24	3	0.158333	836.117	200	459.932	72.8225
	DBP	4	0.211111	15.3	5	3.06	0.646		DBP	4	0.211111	3.44078	5	0.688157	0.145278		DBP	4	0.211111	322.545	5	0.064509	0.0136186		DBP	4	0.211111	39.9606	5	7992.12	1687.23		DBP	4	0.211111	1483.95	5	296.79	62.6558		DBP	278.34	4	0.211111	492.062	5	8644.77	1825.01
	BBP	3	0.158333	0.01	20	0.0005	7.91667e-05		BBP	3	0.158333	3.16826	20	0.158413	0.0250821		BBP	3	0.158333		20	0	0		BBP	3	0.158333		20	0	0		BBP	3	0.158333	142.262	20	7.11312	1.12624		BBP	312.4	3	0.158333		20	0	0
	DEHP	5	0.263889	3.56667	20	0.178333	0.0470602		DEHP	5	0.263889	31.3283	20	1.56642	0.41336		DEHP	5	0.263889		20	0	0		DEHP	5	0.263889		20	0	0		DEHP	5	0.263889	1456.33	20	72.8165	19.2155		DEHP	390.564	5	0.263889		20	0	0
		18					0.69315			18					0.59854			18					0.0137121			18					1691.94			18					83.1289				18					1906.85
Japan	PAEs	Weightage	Relative weightage	Concentration	EQS (ppb)	Quality Rating	Sub Index	Japan	PAEs	Weightage	Relative weightage	Concentration	EQS (ppb)	Quality Rating	Sub Index	Japan	PAEs	Weightage	Relative weightage	Concentration	EQS (ppb)	Quality Rating	Sub Index	Japan	PAEs	Weightage	Relative weightage	Concentration	EQS (ppb)	Quality Rating	Sub Index	Japan	PAEs	Weightage	Relative weightage	Concentration	EQS (ppb)	Quality Rating	Sub Index	Japan	PAEs	Molecular weight	Weightage	Relative weightage	Concentration	EQS (ppb)	Quality Rating	Sub Index	Japan
	DMP	3	0.158333	1.01814	800	0.00127268	0.000201507		DMP	3	0.158333	0.586875	800	0.000733594	0.000116152		DMP	3	0.158333	47.4786	800	5.93482e-05	9.3968e-06		DMP	3	0.158333	5.59458	800	6.99323	1.10726		DMP	3	0.158333	32.4	800	0.0405	0.0064125		DMP	194.18	3	0.158333	361.775	800	56.9407	9.01561
	DEP	3	0.158333	449.199	200	2.24599	0.355616		DEP	3	0.158333	18.5739	200	0.0928693	0.0147043		DEP	3	0.158333	106.259	200	0.000531295	8.41217e-05		DEP	3	0.158333	4.55917	200	22.7958	3.60934		DEP	3	0.158333	157.967	200	0.789833	0.125057		DEP	222.24	3	0.158333	836.117	200	459.932	72.8225
	DBP	4	0.211111	0.274	5	0.0548	0.0115689		DBP	4	0.211111	3.44078	5	0.688157	0.145278		DBP	4	0.211111	322.545	5	0.064509	0.0136186		DBP	4	0.211111	39.9606	5	7992.12	1687.23		DBP	4	0.211111	1483.95	5	296.79	62.6558		DBP	278.34	4	0.211111	492.062	5	8644.77	1825.01
	BBP	3	0.158333	4.76293	20	0.238146	0.0377065		BBP	3	0.158333	3.16826	20	0.158413	0.0250821		BBP	3	0.158333		20	0	0		BBP	3	0.158333		20	0	0		BBP	3	0.158333	142.262	20	7.11312	1.12624		BBP	312.4	3	0.158333		20	0	0
	DEHP	5	0.263889	1.8065	20	0.090325	0.0238358		DEHP	5	0.263889	31.3283	20	1.56642	0.41336		DEHP	5	0.263889		20	0	0		DEHP	5	0.263889		20	0	0		DEHP	5	0.263889	1456.33	20	72.8165	19.2155		DEHP	390.564	5	0.263889		20	0	0
		18					0.428928			18					0.59854			18					0.0137121			18					1691.94			18					83.1289				18					1906.85
Jordanian	PAEs	Weightage	Relative weightage	Concentration	EQS (ppb)	Quality Rating	Sub Index	Jordanian	PAEs	Weightage	Relative weightage	Concentration	EQS (ppb)	Quality Rating	Sub Index	Jordanian	PAEs	Weightage	Relative weightage	Concentration	EQS (ppb)	Quality Rating	Sub Index	Jordanian	PAEs	Weightage	Relative weightage	Concentration	EQS (ppb)	Quality Rating	Sub Index	Jordanian	PAEs	Weightage	Relative weightage	Concentration	EQS (ppb)	Quality Rating	Sub Index	Jordanian	PAEs	Molecular weight	Weightage	Relative weightage	Concentration	EQS (ppb)	Quality Rating	Sub Index	Jordanian
	DMP	3	0.158333	1.01814	800	0.00127268	0.000201507		DMP	3	0.158333	0.586875	800	0.000733594	0.000116152		DMP	3	0.158333	47.4786	800	5.93482e-05	9.3968e-06		DMP	3	0.158333	5.59458	800	6.99323	1.10726		DMP	3	0.158333	32.4	800	0.0405	0.0064125		DMP	194.18	3	0.158333	361.775	800	56.9407	9.01561
	DEP	3	0.158333	449.199	200	2.24599	0.355616		DEP	3	0.158333	18.5739	200	0.0928693	0.0147043		DEP	3	0.158333	106.259	200	0.000531295	8.41217e-05		DEP	3	0.158333	4.55917	200	22.7958	3.60934		DEP	3	0.158333	157.967	200	0.789833	0.125057		DEP	222.24	3	0.158333	836.117	200	459.932	72.8225
	DBP	4	0.211111	0.8	5	0.16	0.0337778		DBP	4	0.211111	3.44078	5	0.688157	0.145278		DBP	4	0.211111	322.545	5	0.064509	0.0136186		DBP	4	0.211111	39.9606	5	7992.12	1687.23		DBP	4	0.211111	1483.95	5	296.79	62.6558		DBP	278.34	4	0.211111	492.062	5	8644.77	1825.01
	BBP	3	0.158333	0.915	20	0.04575	0.00724375		BBP	3	0.158333	3.16826	20	0.158413	0.0250821		BBP	3	0.158333		20	0	0		BBP	3	0.158333		20	0	0		BBP	3	0.158333	142.262	20	7.11312	1.12624		BBP	312.4	3	0.158333		20	0	0
	DEHP	5	0.263889	0.4725	20	0.023625	0.00623438		DEHP	5	0.263889	31.3283	20	1.56642	0.41336		DEHP	5	0.263889		20	0	0		DEHP	5	0.263889		20	0	0		DEHP	5	0.263889	1456.33	20	72.8165	19.2155		DEHP	390.564	5	0.263889		20	0	0
		18					0.403073			18					0.59854			18					0.0137121			18					1691.94			18					83.1289				18					1906.85
Malaysia	PAEs	Weightage	Relative weightage	Concentration	EQS (ppb)	Quality Rating	Sub Index	Malaysia	PAEs	Weightage	Relative weightage	Concentration	EQS (ppb)	Quality Rating	Sub Index	Malaysia	PAEs	Weightage	Relative weightage	Concentration	EQS (ppb)	Quality Rating	Sub Index	Malaysia	PAEs	Weightage	Relative weightage	Concentration	EQS (ppb)	Quality Rating	Sub Index	Malaysia	PAEs	Weightage	Relative weightage	Concentration	EQS (ppb)	Quality Rating	Sub Index	Malaysia	PAEs	Molecular weight	Weightage	Relative weightage	Concentration	EQS (ppb)	Quality Rating	Sub Index	Malaysia
	DMP	3	0.158333	0.05	800	6.25e-05	9.89583e-06		DMP	3	0.158333	0.586875	800	0.000733594	0.000116152		DMP	3	0.158333	47.4786	800	5.93482e-05	9.3968e-06		DMP	3	0.158333	5.59458	800	6.99323	1.10726		DMP	3	0.158333	32.4	800	0.0405	0.0064125		DMP	194.18	3	0.158333	361.775	800	56.9407	9.01561
	DEP	3	0.158333	0.05	200	0.00025	3.95833e-05		DEP	3	0.158333	18.5739	200	0.0928693	0.0147043		DEP	3	0.158333	106.259	200	0.000531295	8.41217e-05		DEP	3	0.158333	4.55917	200	22.7958	3.60934		DEP	3	0.158333	157.967	200	0.789833	0.125057		DEP	222.24	3	0.158333	836.117	200	459.932	72.8225
	DBP	4	0.211111	1.6	5	0.32	0.0675556		DBP	4	0.211111	3.44078	5	0.688157	0.145278		DBP	4	0.211111	322.545	5	0.064509	0.0136186		DBP	4	0.211111	39.9606	5	7992.12	1687.23		DBP	4	0.211111	1483.95	5	296.79	62.6558		DBP	278.34	4	0.211111	492.062	5	8644.77	1825.01
	BBP	3	0.158333	4.76293	20	0.238146	0.0377065		BBP	3	0.158333	3.16826	20	0.158413	0.0250821		BBP	3	0.158333		20	0	0		BBP	3	0.158333		20	0	0		BBP	3	0.158333	142.262	20	7.11312	1.12624		BBP	312.4	3	0.158333		20	0	0
	DEHP	5	0.263889	16.6	20	0.83	0.219028		DEHP	5	0.263889	31.3283	20	1.56642	0.41336		DEHP	5	0.263889		20	0	0		DEHP	5	0.263889		20	0	0		DEHP	5	0.263889	1456.33	20	72.8165	19.2155		DEHP	390.564	5	0.263889		20	0	0
		18					0.324339			18					0.59854			18					0.0137121			18					1691.94			18					83.1289				18					1906.85
Mexico	PAEs	Weightage	Relative weightage	Concentration	EQS (ppb)	Quality Rating	Sub Index	Mexico	PAEs	Weightage	Relative weightage	Concentration	EQS (ppb)	Quality Rating	Sub Index	Mexico	PAEs	Weightage	Relative weightage	Concentration	EQS (ppb)	Quality Rating	Sub Index	Mexico	PAEs	Weightage	Relative weightage	Concentration	EQS (ppb)	Quality Rating	Sub Index	Mexico	PAEs	Weightage	Relative weightage	Concentration	EQS (ppb)	Quality Rating	Sub Index	Mexico	PAEs	Molecular weight	Weightage	Relative weightage	Concentration	EQS (ppb)	Quality Rating	Sub Index	Mexico
	DMP	3	0.158333	1.01814	800	0.00127268	0.000201507		DMP	3	0.158333	0.586875	800	0.000733594	0.000116152		DMP	3	0.158333	47.4786	800	5.93482e-05	9.3968e-06		DMP	3	0.158333	5.59458	800	6.99323	1.10726		DMP	3	0.158333	32.4	800	0.0405	0.0064125		DMP	194.18	3	0.158333	361.775	800	56.9407	9.01561
	DEP	3	0.158333	449.199	200	2.24599	0.355616		DEP	3	0.158333	18.5739	200	0.0928693	0.0147043		DEP	3	0.158333	106.259	200	0.000531295	8.41217e-05		DEP	3	0.158333	4.55917	200	22.7958	3.60934		DEP	3	0.158333	157.967	200	0.789833	0.125057		DEP	222.24	3	0.158333	836.117	200	459.932	72.8225
	DBP	4	0.211111	442.918	5	88.5836	18.701		DBP	4	0.211111	3.44078	5	0.688157	0.145278		DBP	4	0.211111	322.545	5	0.064509	0.0136186		DBP	4	0.211111	39.9606	5	7992.12	1687.23		DBP	4	0.211111	8	5	1.6	0.337778		DBP	278.34	4	0.211111	0.3	5	5.27053	1.11267
	BBP	3	0.158333	0.06375	20	0.0031875	0.000504688		BBP	3	0.158333	3.16826	20	0.158413	0.0250821		BBP	3	0.158333		20	0	0		BBP	3	0.158333		20	0	0		BBP	3	0.158333	142.262	20	7.11312	1.12624		BBP	312.4	3	0.158333		20	0	0
	DEHP	5	0.263889	0.668	20	0.0334	0.00881389		DEHP	5	0.263889	31.3283	20	1.56642	0.41336		DEHP	5	0.263889		20	0	0		DEHP	5	0.263889		20	0	0		DEHP	5	0.263889	25.8667	20	1.29333	0.341296		DEHP	390.564	5	0.263889		20	0	0
		18					19.0661			18					0.59854			18					0.0137121			18					1691.94			18					1.93679				18					82.9508
Netherlands	PAEs	Weightage	Relative weightage	Concentration	EQS (ppb)	Quality Rating	Sub Index	Netherlands	PAEs	Weightage	Relative weightage	Concentration	EQS (ppb)	Quality Rating	Sub Index	Netherlands	PAEs	Weightage	Relative weightage	Concentration	EQS (ppb)	Quality Rating	Sub Index	Netherlands	PAEs	Weightage	Relative weightage	Concentration	EQS (ppb)	Quality Rating	Sub Index	Netherlands	PAEs	Weightage	Relative weightage	Concentration	EQS (ppb)	Quality Rating	Sub Index	Netherlands	PAEs	Molecular weight	Weightage	Relative weightage	Concentration	EQS (ppb)	Quality Rating	Sub Index	Netherlands
	DMP	3	0.158333	0.017	800	2.125e-05	3.36458e-06		DMP	3	0.158333	1	800	0.00125	0.000197917		DMP	3	0.158333	47.4786	800	5.93482e-05	9.3968e-06		DMP	3	0.158333	5.59458	800	6.99323	1.10726		DMP	3	0.158333	32.4	800	0.0405	0.0064125		DMP	194.18	3	0.158333	361.775	800	56.9407	9.01561
	DEP	3	0.158333	0.42	200	0.0021	0.0003325		DEP	3	0.158333	24.05	200	0.12025	0.0190396		DEP	3	0.158333	106.259	200	0.000531295	8.41217e-05		DEP	3	0.158333	4.55917	200	22.7958	3.60934		DEP	3	0.158333	157.967	200	0.789833	0.125057		DEP	222.24	3	0.158333	836.117	200	459.932	72.8225
	DBP	4	0.211111	1.12533	5	0.225067	0.0475141		DBP	4	0.211111	10	5	2	0.422222		DBP	4	0.211111	322.545	5	0.064509	0.0136186		DBP	4	0.211111	39.9606	5	7992.12	1687.23		DBP	4	0.211111	1483.95	5	296.79	62.6558		DBP	278.34	4	0.211111	492.062	5	8644.77	1825.01
	BBP	3	0.158333	0.077	20	0.00385	0.000609583		BBP	3	0.158333	10	20	0.5	0.0791667		BBP	3	0.158333		20	0	0		BBP	3	0.158333		20	0	0		BBP	3	0.158333	142.262	20	7.11312	1.12624		BBP	312.4	3	0.158333		20	0	0
	DEHP	5	0.263889	1.4125	20	0.070625	0.0186372		DEHP	5	0.263889	57	20	2.85	0.752083		DEHP	5	0.263889		20	0	0		DEHP	5	0.263889		20	0	0		DEHP	5	0.263889	1456.33	20	72.8165	19.2155		DEHP	390.564	5	0.263889		20	0	0
		18					0.0670967			18					1.27271			18					0.0137121			18					1691.94			18					83.1289				18					1906.85
Nigeria	PAEs	Weightage	Relative weightage	Concentration	EQS (ppb)	Quality Rating	Sub Index	Nigeria	PAEs	Weightage	Relative weightage	Concentration	EQS (ppb)	Quality Rating	Sub Index	Nigeria	PAEs	Weightage	Relative weightage	Concentration	EQS (ppb)	Quality Rating	Sub Index	Nigeria	PAEs	Weightage	Relative weightage	Concentration	EQS (ppb)	Quality Rating	Sub Index	Nigeria	PAEs	Weightage	Relative weightage	Concentration	EQS (ppb)	Quality Rating	Sub Index	Nigeria	PAEs	Molecular weight	Weightage	Relative weightage	Concentration	EQS (ppb)	Quality Rating	Sub Index	Nigeria
	DMP	3	0.158333	119801	800	149.751	23.7105		DMP	3	0.158333	0.586875	800	0.000733594	0.000116152		DMP	3	0.158333	1.92833e+08	800	241.042	38.1649		DMP	3	0.158333	24.02	800	30.025	4.75396		DMP	3	0.158333	32.4	800	0.0405	0.0064125		DMP	194.18	3	0.158333	361.775	800	56.9407	9.01561
	DEP	3	0.158333	123232	200	616.161	97.5588		DEP	3	0.158333	18.5739	200	0.0928693	0.0147043		DEP	3	0.158333	417500000	200	2087.5	330.521		DEP	3	0.158333	25.08	200	125.4	19.855		DEP	3	0.158333	157.967	200	0.789833	0.125057		DEP	222.24	3	0.158333	836.117	200	459.932	72.8225
	DBP	4	0.211111	393024	5	78604.9	16594.4		DBP	4	0.211111	3.44078	5	0.688157	0.145278		DBP	4	0.211111	319000000	5	63800	13468.9		DBP	4	0.211111	46.25	5	9250	1952.78		DBP	4	0.211111	1483.95	5	296.79	62.6558		DBP	278.34	4	0.211111	492.062	5	8644.77	1825.01
	BBP	3	0.158333	0	20	0	0		BBP	3	0.158333	3.16826	20	0.158413	0.0250821		BBP	3	0.158333		20	0	0		BBP	3	0.158333		20	0	0		BBP	3	0.158333	142.262	20	7.11312	1.12624		BBP	312.4	3	0.158333		20	0	0
	DEHP	5	0.263889	80530	20	4026.5	1062.55		DEHP	5	0.263889	31.3283	20	1.56642	0.41336		DEHP	5	0.263889		20	0	0		DEHP	5	0.263889		20	0	0		DEHP	5	0.263889	1456.33	20	72.8165	19.2155		DEHP	390.564	5	0.263889		20	0	0
		18					17778.2			18					0.59854			18					13837.6			18					1977.39			18					83.1289				18					1906.85
SaudiArabia	PAEs	Weightage	Relative weightage	Concentration	EQS (ppb)	Quality Rating	Sub Index	SaudiArabia	PAEs	Weightage	Relative weightage	Concentration	EQS (ppb)	Quality Rating	Sub Index	SaudiArabia	PAEs	Weightage	Relative weightage	Concentration	EQS (ppb)	Quality Rating	Sub Index	SaudiArabia	PAEs	Weightage	Relative weightage	Concentration	EQS (ppb)	Quality Rating	Sub Index	SaudiArabia	PAEs	Weightage	Relative weightage	Concentration	EQS (ppb)	Quality Rating	Sub Index	SaudiArabia	PAEs	Molecular weight	Weightage	Relative weightage	Concentration	EQS (ppb)	Quality Rating	Sub Index	SaudiArabia
	DMP	3	0.158333	6.98	800	0.008725	0.00138146		DMP	3	0.158333	0.586875	800	0.000733594	0.000116152		DMP	3	0.158333	47.4786	800	5.93482e-05	9.3968e-06		DMP	3	0.158333	5.59458	800	6.99323	1.10726		DMP	3	0.158333	32.4	800	0.0405	0.0064125		DMP	194.18	3	0.158333	361.775	800	56.9407	9.01561
	DEP	3	0.158333	0	200	0	0		DEP	3	0.158333	18.5739	200	0.0928693	0.0147043		DEP	3	0.158333	106.259	200	0.000531295	8.41217e-05		DEP	3	0.158333	4.55917	200	22.7958	3.60934		DEP	3	0.158333	157.967	200	0.789833	0.125057		DEP	222.24	3	0.158333	836.117	200	459.932	72.8225
	DBP	4	0.211111	7.9	5	1.58	0.333556		DBP	4	0.211111	3.44078	5	0.688157	0.145278		DBP	4	0.211111	322.545	5	0.064509	0.0136186		DBP	4	0.211111	39.9606	5	7992.12	1687.23		DBP	4	0.211111	1483.95	5	296.79	62.6558		DBP	278.34	4	0.211111	492.062	5	8644.77	1825.01
	BBP	3	0.158333	36.5	20	1.825	0.288958		BBP	3	0.158333	3.16826	20	0.158413	0.0250821		BBP	3	0.158333		20	0	0		BBP	3	0.158333		20	0	0		BBP	3	0.158333	142.262	20	7.11312	1.12624		BBP	312.4	3	0.158333		20	0	0
	DEHP	5	0.263889	0	20	0	0		DEHP	5	0.263889	31.3283	20	1.56642	0.41336		DEHP	5	0.263889		20	0	0		DEHP	5	0.263889		20	0	0		DEHP	5	0.263889	1456.33	20	72.8165	19.2155		DEHP	390.564	5	0.263889		20	0	0
		18					0.623895			18					0.59854			18					0.0137121			18					1691.94			18					83.1289				18					1906.85
South Africa	PAEs	Weightage	Relative weightage	Concentration	EQS (ppb)	Quality Rating	Sub Index	South Africa	PAEs	Weightage	Relative weightage	Concentration	EQS (ppb)	Quality Rating	Sub Index	South Africa	PAEs	Weightage	Relative weightage	Concentration	EQS (ppb)	Quality Rating	Sub Index	South Africa	PAEs	Weightage	Relative weightage	Concentration	EQS (ppb)	Quality Rating	Sub Index	South Africa	PAEs	Weightage	Relative weightage	Concentration	EQS (ppb)	Quality Rating	Sub Index	South Africa	PAEs	Molecular weight	Weightage	Relative weightage	Concentration	EQS (ppb)	Quality Rating	Sub Index	South Africa
	DMP	3	0.158333	1.01814	800	0.00127268	0.000201507		DMP	3	0.158333	0.586875	800	0.000733594	0.000116152		DMP	3	0.158333	47.4786	800	5.93482e-05	9.3968e-06		DMP	3	0.158333	5.59458	800	6.99323	1.10726		DMP	3	0.158333	0	800	0	0		DMP	194.18	3	0.158333	361.775	800	56.9407	9.01561
	DEP	3	0.158333	3142.14	200	15.7107	2.48753		DEP	3	0.158333	18.5739	200	0.0928693	0.0147043		DEP	3	0.158333	106.259	200	0.000531295	8.41217e-05		DEP	3	0.158333	4.55917	200	22.7958	3.60934		DEP	3	0.158333	183.125	200	0.915625	0.144974		DEP	222.24	3	0.158333	836.117	200	459.932	72.8225
	DBP	4	0.211111	4160	5	832	175.644		DBP	4	0.211111	3.44078	5	0.688157	0.145278		DBP	4	0.211111	322.545	5	0.064509	0.0136186		DBP	4	0.211111	39.9606	5	7992.12	1687.23		DBP	4	0.211111	378.235	5	75.6471	15.9699		DBP	278.34	4	0.211111	492.062	5	8644.77	1825.01
	BBP	3	0.158333	4.76293	20	0.238146	0.0377065		BBP	3	0.158333	3.16826	20	0.158413	0.0250821		BBP	3	0.158333		20	0	0		BBP	3	0.158333		20	0	0		BBP	3	0.158333	142.262	20	7.11312	1.12624		BBP	312.4	3	0.158333		20	0	0
	DEHP	5	0.263889	990	20	49.5	13.0625		DEHP	5	0.263889	31.3283	20	1.56642	0.41336		DEHP	5	0.263889		20	0	0		DEHP	5	0.263889		20	0	0		DEHP	5	0.263889	149.333	20	7.46667	1.97037		DEHP	390.564	5	0.263889		20	0	0
		18					191.232			18					0.59854			18					0.0137121			18					1691.94			18					19.2115				18					1906.85
				0								0
Taiwan	PAEs	Weightage	Relative weightage	Concentration	EQS (ppb)	Quality Rating	Sub Index	Taiwan	PAEs	Weightage	Relative weightage	Concentration	EQS (ppb)	Quality Rating	Sub Index	Taiwan	PAEs	Weightage	Relative weightage	Concentration	EQS (ppb)	Quality Rating	Sub Index	Taiwan	PAEs	Weightage	Relative weightage	Concentration	EQS (ppb)	Quality Rating	Sub Index	Taiwan	PAEs	Weightage	Relative weightage	Concentration	EQS (ppb)	Quality Rating	Sub Index	Taiwan	PAEs	Molecular weight	Weightage	Relative weightage	Concentration	EQS (ppb)	Quality Rating	Sub Index	Taiwan
	DMP	3	0.158333	0.5	800	0.000625	9.89583e-05		DMP	3	0.158333	0.586875	800	0.000733594	0.000116152		DMP	3	0.158333	1.57143	800	1.96429e-06	3.11012e-07		DMP	3	0.158333	5.59458	800	6.99323	1.10726		DMP	3	0.158333	32.4	800	0.0405	0.0064125		DMP	194.18	3	0.158333	361.775	800	56.9407	9.01561
	DEP	3	0.158333	449.199	200	2.24599	0.355616		DEP	3	0.158333	18.5739	200	0.0928693	0.0147043		DEP	3	0.158333	2.71429	200	1.35714e-05	2.14881e-06		DEP	3	0.158333	4.55917	200	22.7958	3.60934		DEP	3	0.158333	200	200	1	0.158333		DEP	222.24	3	0.158333	836.117	200	459.932	72.8225
	DBP	4	0.211111	442.918	5	88.5836	18.701		DBP	4	0.211111	3.44078	5	0.688157	0.145278		DBP	4	0.211111	52.5714	5	0.0105143	0.00221968		DBP	4	0.211111	39.9606	5	7992.12	1687.23		DBP	4	0.211111	6300	5	1260	266		DBP	278.34	4	0.211111	492.062	5	8644.77	1825.01
	BBP	3	0.158333	0	20	0	0		BBP	3	0.158333	3.16826	20	0.158413	0.0250821		BBP	3	0.158333		20	0	0		BBP	3	0.158333		20	0	0		BBP	3	0.158333	200	20	10	1.58333		BBP	312.4	3	0.158333		20	0	0
	DEHP	5	0.263889	9.3	20	0.465	0.122708		DEHP	5	0.263889	31.3283	20	1.56642	0.41336		DEHP	5	0.263889		20	0	0		DEHP	5	0.263889		20	0	0		DEHP	5	0.263889	4600	20	230	60.6944		DEHP	390.564	5	0.263889		20	0	0
		18					19.1794			18					0.59854			18					0.00222214			18					1691.94			18					328.443				18					1906.85
U.K.	PAEs	Weightage	Relative weightage	Concentration	EQS (ppb)	Quality Rating	Sub Index	U.K.	PAEs	Weightage	Relative weightage	Concentration	EQS (ppb)	Quality Rating	Sub Index	U.K.	PAEs	Weightage	Relative weightage	Concentration	EQS (ppb)	Quality Rating	Sub Index	U.K.	PAEs	Weightage	Relative weightage	Concentration	EQS (ppb)	Quality Rating	Sub Index	U.K.	PAEs	Weightage	Relative weightage	Concentration	EQS (ppb)	Quality Rating	Sub Index	U.K.	PAEs	Molecular weight	Weightage	Relative weightage	Concentration	EQS (ppb)	Quality Rating	Sub Index	U.K.
	DMP	3	0.158333	1.01814	800	0.00127268	0.000201507		DMP	3	0.158333	0.26	800	0.000325	5.14583e-05		DMP	3	0.158333	47.4786	800	5.93482e-05	9.3968e-06		DMP	3	0.158333	5.59458	800	6.99323	1.10726		DMP	3	0.158333	32.4	800	0.0405	0.0064125		DMP	194.18	3	0.158333	361.775	800	56.9407	9.01561
	DEP	3	0.158333	0.466667	200	0.00233333	0.000369444		DEP	3	0.158333	25	200	0.125	0.0197917		DEP	3	0.158333	106.259	200	0.000531295	8.41217e-05		DEP	3	0.158333	4.55917	200	22.7958	3.60934		DEP	3	0.158333	157.967	200	0.789833	0.125057		DEP	222.24	3	0.158333	836.117	200	459.932	72.8225
	DBP	4	0.211111	442.918	5	88.5836	18.701		DBP	4	0.211111	2.54	5	0.508	0.107244		DBP	4	0.211111	322.545	5	0.064509	0.0136186		DBP	4	0.211111	39.9606	5	7992.12	1687.23		DBP	4	0.211111	1483.95	5	296.79	62.6558		DBP	278.34	4	0.211111	492.062	5	8644.77	1825.01
	BBP	3	0.158333	4.76293	20	0.238146	0.0377065		BBP	3	0.158333	1.46	20	0.073	0.0115583		BBP	3	0.158333		20	0	0		BBP	3	0.158333		20	0	0		BBP	3	0.158333	142.262	20	7.11312	1.12624		BBP	312.4	3	0.158333		20	0	0
	DEHP	5	0.263889	0.5	20	0.025	0.00659722		DEHP	5	0.263889	23.6	20	1.18	0.311389		DEHP	5	0.263889		20	0	0		DEHP	5	0.263889		20	0	0		DEHP	5	0.263889	1456.33	20	72.8165	19.2155		DEHP	390.564	5	0.263889		20	0	0
		18					18.7458			18					0.450035			18					0.0137121			18					1691.94			18					83.1289				18					1906.85
Australia	PAEs	Weightage	Relative weightage	Concentration	EQS (ppb)	Quality Rating	Sub Index	Australia	PAEs	Weightage	Relative weightage	Concentration	EQS (ppb)	Quality Rating	Sub Index	Australia	PAEs	Weightage	Relative weightage	Concentration	EQS (ppb)	Quality Rating	Sub Index	Australia	PAEs	Weightage	Relative weightage	Concentration	EQS (ppb)	Quality Rating	Sub Index	Australia	PAEs	Weightage	Relative weightage	Concentration	EQS (ppb)	Quality Rating	Sub Index	Australia	PAEs	Molecular weight	Weightage	Relative weightage	Concentration	EQS (ppb)	Quality Rating	Sub Index	Australia
	DMP	3	0.158333	1.01814	800	0.00127268	0.000201507		DMP	3	0.158333	0.586875	800	0.000733594	0.000116152		DMP	3	0.158333	47.4786	800	5.93482e-05	9.3968e-06		DMP	3	0.158333	5.59458	800	6.99323	1.10726		DMP	3	0.158333	32.4	800	0.0405	0.0064125		DMP	194.18	3	0.158333	361.775	800	56.9407	9.01561
	DEP	3	0.158333	449.199	200	2.24599	0.355616		DEP	3	0.158333	0.0593	200	0.0002965	4.69458e-05		DEP	3	0.158333	106.259	200	0.000531295	8.41217e-05		DEP	3	0.158333	4.55917	200	22.7958	3.60934		DEP	3	0.158333	157.967	200	0.789833	0.125057		DEP	222.24	3	0.158333	836.117	200	459.932	72.8225
	DBP	4	0.211111	442.918	5	88.5836	18.701		DBP	4	0.211111	0.0247	5	0.00494	0.00104289		DBP	4	0.211111	322.545	5	0.064509	0.0136186		DBP	4	0.211111	39.9606	5	7992.12	1687.23		DBP	4	0.211111	1483.95	5	296.79	62.6558		DBP	278.34	4	0.211111	492.062	5	8644.77	1825.01
	BBP	3	0.158333	4.76293	20	0.238146	0.0377065		BBP	3	0.158333	0.0063	20	0.000315	4.9875e-05		BBP	3	0.158333		20	0	0		BBP	3	0.158333		20	0	0		BBP	3	0.158333	142.262	20	7.11312	1.12624		BBP	312.4	3	0.158333		20	0	0
	DEHP	5	0.263889	95.2564	20	4.76282	1.25686		DEHP	5	0.263889	2.38	20	0.119	0.0314028		DEHP	5	0.263889		20	0	0		DEHP	5	0.263889		20	0	0		DEHP	5	0.263889	1456.33	20	72.8165	19.2155		DEHP	390.564	5	0.263889		20	0	0
		18					20.3514			18					0.0326586			18					0.0137121			18					1691.94			18					83.1289				18					1906.85
Finland	PAEs	Weightage	Relative weightage	Concentration	EQS (ppb)	Quality Rating	Sub Index	Finland	PAEs	Weightage	Relative weightage	Concentration	EQS (ppb)	Quality Rating	Sub Index	Finland	PAEs	Weightage	Relative weightage	Concentration	EQS (ppb)	Quality Rating	Sub Index	Finland	PAEs	Weightage	Relative weightage	Concentration	EQS (ppb)	Quality Rating	Sub Index	Finland	PAEs	Weightage	Relative weightage	Concentration	EQS (ppb)	Quality Rating	Sub Index	Finland	PAEs	Molecular weight	Weightage	Relative weightage	Concentration	EQS (ppb)	Quality Rating	Sub Index	Finland
	DMP	3	0.158333	1.01814	800	0.00127268	0.000201507		DMP	3	0.158333	0.5	800	0.000625	9.89583e-05		DMP	3	0.158333	47.4786	800	5.93482e-05	9.3968e-06		DMP	3	0.158333	0	800	0	0		DMP	3	0.158333	32.4	800	0.0405	0.0064125		DMP	194.18	3	0.158333	361.775	800	56.9407	9.01561
	DEP	3	0.158333	449.199	200	2.24599	0.355616		DEP	3	0.158333	39.5	200	0.1975	0.0312708		DEP	3	0.158333	106.259	200	0.000531295	8.41217e-05		DEP	3	0.158333	0	200	0	0		DEP	3	0.158333	157.967	200	0.789833	0.125057		DEP	222.24	3	0.158333	836.117	200	459.932	72.8225
	DBP	4	0.211111	442.918	5	88.5836	18.701		DBP	4	0.211111	6	5	1.2	0.253333		DBP	4	0.211111	322.545	5	0.064509	0.0136186		DBP	4	0.211111	1	5	200	42.2222		DBP	4	0.211111	1483.95	5	296.79	62.6558		DBP	278.34	4	0.211111	492.062	5	8644.77	1825.01
	BBP	3	0.158333	4.76293	20	0.238146	0.0377065		BBP	3	0.158333	3	20	0.15	0.02375		BBP	3	0.158333		20	0	0		BBP	3	0.158333		20	0	0		BBP	3	0.158333	142.262	20	7.11312	1.12624		BBP	312.4	3	0.158333		20	0	0
	DEHP	5	0.263889	95.2564	20	4.76282	1.25686		DEHP	5	0.263889	75	20	3.75	0.989583		DEHP	5	0.263889		20	0	0		DEHP	5	0.263889		20	0	0		DEHP	5	0.263889	1456.33	20	72.8165	19.2155		DEHP	390.564	5	0.263889		20	0	0
		18					20.3514			18					1.29804			18					0.0137121			18					42.2222			18					83.1289				18					1906.85
Greece	PAEs	Weightage	Relative weightage	Concentration	EQS (ppb)	Quality Rating	Sub Index	Greece	PAEs	Weightage	Relative weightage	Concentration	EQS (ppb)	Quality Rating	Sub Index	Greece	PAEs	Weightage	Relative weightage	Concentration	EQS (ppb)	Quality Rating	Sub Index	Greece	PAEs	Weightage	Relative weightage	Concentration	EQS (ppb)	Quality Rating	Sub Index	Greece	PAEs	Weightage	Relative weightage	Concentration	EQS (ppb)	Quality Rating	Sub Index	Greece	PAEs	Molecular weight	Weightage	Relative weightage	Concentration	EQS (ppb)	Quality Rating	Sub Index	Greece
	DMP	3	0.158333	1.01814	800	0.00127268	0.000201507		DMP	3	0.158333	0.586875	800	0.000733594	0.000116152		DMP	3	0.158333	47.4786	800	5.93482e-05	9.3968e-06		DMP	3	0.158333	5.59458	800	6.99323	1.10726		DMP	3	0.158333	32.4	800	0.0405	0.0064125		DMP	194.18	3	0.158333	361.775	800	56.9407	9.01561
	DEP	3	0.158333	449.199	200	2.24599	0.355616		DEP	3	0.158333	18.5739	200	0.0928693	0.0147043		DEP	3	0.158333	300	200	0.0015	0.0002375		DEP	3	0.158333	4.55917	200	22.7958	3.60934		DEP	3	0.158333	157.967	200	0.789833	0.125057		DEP	222.24	3	0.158333	836.117	200	459.932	72.8225
	DBP	4	0.211111	442.918	5	88.5836	18.701		DBP	4	0.211111	3.44078	5	0.688157	0.145278		DBP	4	0.211111	1040	5	0.208	0.0439111		DBP	4	0.211111	39.9606	5	7992.12	1687.23		DBP	4	0.211111	1483.95	5	296.79	62.6558		DBP	278.34	4	0.211111	492.062	5	8644.77	1825.01
	BBP	3	0.158333	4.76293	20	0.238146	0.0377065		BBP	3	0.158333	3.16826	20	0.158413	0.0250821		BBP	3	0.158333		20	0	0		BBP	3	0.158333		20	0	0		BBP	3	0.158333	142.262	20	7.11312	1.12624		BBP	312.4	3	0.158333		20	0	0
	DEHP	5	0.263889	95.2564	20	4.76282	1.25686		DEHP	5	0.263889	31.3283	20	1.56642	0.41336		DEHP	5	0.263889		20	0	0		DEHP	5	0.263889		20	0	0		DEHP	5	0.263889	1456.33	20	72.8165	19.2155		DEHP	390.564	5	0.263889		20	0	0
		18					20.3514			18					0.59854			18					0.044158			18					1691.94			18					83.1289				18					1906.85
India	PAEs	Weightage	Relative weightage	Concentration	EQS (ppb)	Quality Rating	Sub Index	India	PAEs	Weightage	Relative weightage	Concentration	EQS (ppb)	Quality Rating	Sub Index	India	PAEs	Weightage	Relative weightage	Concentration	EQS (ppb)	Quality Rating	Sub Index	India	PAEs	Weightage	Relative weightage	Concentration	EQS (ppb)	Quality Rating	Sub Index	India	PAEs	Weightage	Relative weightage	Concentration	EQS (ppb)	Quality Rating	Sub Index	India	PAEs	Molecular weight	Weightage	Relative weightage	Concentration	EQS (ppb)	Quality Rating	Sub Index	India
	DMP	3	0.158333	1.01814	800	0.00127268	0.000201507		DMP	3	0.158333	0.586875	800	0.000733594	0.000116152		DMP	3	0.158333	191.5	800	0.000239375	3.7901e-05		DMP	3	0.158333	5.59458	800	6.99323	1.10726		DMP	3	0.158333	32.4	800	0.0405	0.0064125		DMP	194.18	3	0.158333	361.775	800	56.9407	9.01561
	DEP	3	0.158333	449.199	200	2.24599	0.355616		DEP	3	0.158333	18.5739	200	0.0928693	0.0147043		DEP	3	0.158333	102.5	200	0.0005125	8.11458e-05		DEP	3	0.158333	4.55917	200	22.7958	3.60934		DEP	3	0.158333	157.967	200	0.789833	0.125057		DEP	222.24	3	0.158333	836.117	200	459.932	72.8225
	DBP	4	0.211111	442.918	5	88.5836	18.701		DBP	4	0.211111	3.44078	5	0.688157	0.145278		DBP	4	0.211111	158.5	5	0.0317	0.00669222		DBP	4	0.211111	39.9606	5	7992.12	1687.23		DBP	4	0.211111	1483.95	5	296.79	62.6558		DBP	278.34	4	0.211111	492.062	5	8644.77	1825.01
	BBP	3	0.158333	4.76293	20	0.238146	0.0377065		BBP	3	0.158333	3.16826	20	0.158413	0.0250821		BBP	3	0.158333		20	0	0		BBP	3	0.158333		20	0	0		BBP	3	0.158333	142.262	20	7.11312	1.12624		BBP	312.4	3	0.158333		20	0	0
	DEHP	5	0.263889	95.2564	20	4.76282	1.25686		DEHP	5	0.263889	31.3283	20	1.56642	0.41336		DEHP	5	0.263889		20	0	0		DEHP	5	0.263889		20	0	0		DEHP	5	0.263889	1456.33	20	72.8165	19.2155		DEHP	390.564	5	0.263889		20	0	0
		18					20.3514			18					0.59854			18					0.00681127			18					1691.94			18					83.1289				18					1906.85
Czech Republic	PAEs	Weightage	Relative weightage	Concentration	EQS (ppb)	Quality Rating	Sub Index	Czech Republic	PAEs	Weightage	Relative weightage	Concentration	EQS (ppb)	Quality Rating	Sub Index	Czech Republic	PAEs	Weightage	Relative weightage	Concentration	EQS (ppb)	Quality Rating	Sub Index	Czech Republic	PAEs	Weightage	Relative weightage	Concentration	EQS (ppb)	Quality Rating	Sub Index	Czech Republic	PAEs	Weightage	Relative weightage	Concentration	EQS (ppb)	Quality Rating	Sub Index	Czech Republic	PAEs	Molecular weight	Weightage	Relative weightage	Concentration	EQS (ppb)	Quality Rating	Sub Index	Czech Republic
	DMP	3	0.158333	1.01814	800	0.00127268	0.000201507		DMP	3	0.158333	0.586875	800	0.000733594	0.000116152		DMP	3	0.158333	60	800	7.5e-05	1.1875e-05		DMP	3	0.158333	5.59458	800	6.99323	1.10726		DMP	3	0.158333	32.4	800	0.0405	0.0064125		DMP	194.18	3	0.158333	361.775	800	56.9407	9.01561
	DEP	3	0.158333	449.199	200	2.24599	0.355616		DEP	3	0.158333	18.5739	200	0.0928693	0.0147043		DEP	3	0.158333	36.6667	200	0.000183333	2.90278e-05		DEP	3	0.158333	4.55917	200	22.7958	3.60934		DEP	3	0.158333	157.967	200	0.789833	0.125057		DEP	222.24	3	0.158333	836.117	200	459.932	72.8225
	DBP	4	0.211111	442.918	5	88.5836	18.701		DBP	4	0.211111	3.44078	5	0.688157	0.145278		DBP	4	0.211111	143.333	5	0.0286667	0.00605185		DBP	4	0.211111	39.9606	5	7992.12	1687.23		DBP	4	0.211111	1483.95	5	296.79	62.6558		DBP	278.34	4	0.211111	492.062	5	8644.77	1825.01
	BBP	3	0.158333	4.76293	20	0.238146	0.0377065		BBP	3	0.158333	3.16826	20	0.158413	0.0250821		BBP	3	0.158333		20	0	0		BBP	3	0.158333		20	0	0		BBP	3	0.158333	142.262	20	7.11312	1.12624		BBP	312.4	3	0.158333		20	0	0
	DEHP	5	0.263889	95.2564	20	4.76282	1.25686		DEHP	5	0.263889	31.3283	20	1.56642	0.41336		DEHP	5	0.263889		20	0	0		DEHP	5	0.263889		20	0	0		DEHP	5	0.263889	1456.33	20	72.8165	19.2155		DEHP	390.564	5	0.263889		20	0	0
		18					20.3514			18					0.59854			18					0.00609275			18					1691.94			18					83.1289				18					1906.85
Portugal	PAEs	Weightage	Relative weightage	Concentration	EQS (ppb)	Quality Rating	Sub Index	Portugal	PAEs	Weightage	Relative weightage	Concentration	EQS (ppb)	Quality Rating	Sub Index	Portugal	PAEs	Weightage	Relative weightage	Concentration	EQS (ppb)	Quality Rating	Sub Index	Portugal	PAEs	Weightage	Relative weightage	Concentration	EQS (ppb)	Quality Rating	Sub Index	Portugal	PAEs	Weightage	Relative weightage	Concentration	EQS (ppb)	Quality Rating	Sub Index	Portugal	PAEs	Molecular weight	Weightage	Relative weightage	Concentration	EQS (ppb)	Quality Rating	Sub Index	Portugal
	DMP	3	0.158333	1.01814	800	0.00127268	0.000201507		DMP	3	0.158333	0.586875	800	0.000733594	0.000116152		DMP	3	0.158333	20	800	2.5e-05	3.95833e-06		DMP	3	0.158333	5.59458	800	6.99323	1.10726		DMP	3	0.158333	32.4	800	0.0405	0.0064125		DMP	194.18	3	0.158333	361.775	800	56.9407	9.01561
	DEP	3	0.158333	449.199	200	2.24599	0.355616		DEP	3	0.158333	18.5739	200	0.0928693	0.0147043		DEP	3	0.158333	115	200	0.000575	9.10417e-05		DEP	3	0.158333	4.55917	200	22.7958	3.60934		DEP	3	0.158333	157.967	200	0.789833	0.125057		DEP	222.24	3	0.158333	836.117	200	459.932	72.8225
	DBP	4	0.211111	442.918	5	88.5836	18.701		DBP	4	0.211111	3.44078	5	0.688157	0.145278		DBP	4	0.211111	435	5	0.087	0.0183667		DBP	4	0.211111	39.9606	5	7992.12	1687.23		DBP	4	0.211111	1483.95	5	296.79	62.6558		DBP	278.34	4	0.211111	492.062	5	8644.77	1825.01
	BBP	3	0.158333	4.76293	20	0.238146	0.0377065		BBP	3	0.158333	3.16826	20	0.158413	0.0250821		BBP	3	0.158333		20	0	0		BBP	3	0.158333		20	0	0		BBP	3	0.158333	142.262	20	7.11312	1.12624		BBP	312.4	3	0.158333		20	0	0
	DEHP	5	0.263889	95.2564	20	4.76282	1.25686		DEHP	5	0.263889	31.3283	20	1.56642	0.41336		DEHP	5	0.263889		20	0	0		DEHP	5	0.263889		20	0	0		DEHP	5	0.263889	1456.33	20	72.8165	19.2155		DEHP	390.564	5	0.263889		20	0	0
		18					20.3514			18					0.59854			18					0.0184617			18					1691.94			18					83.1289				18					1906.85
Poland	PAEs	Weightage	Relative weightage	Concentration	EQS (ppb)	Quality Rating	Sub Index	Poland	PAEs	Weightage	Relative weightage	Concentration	EQS (ppb)	Quality Rating	Sub Index	Poland	PAEs	Weightage	Relative weightage	Concentration	EQS (ppb)	Quality Rating	Sub Index	Poland	PAEs	Weightage	Relative weightage	Concentration	EQS (ppb)	Quality Rating	Sub Index	Poland	PAEs	Weightage	Relative weightage	Concentration	EQS (ppb)	Quality Rating	Sub Index	Poland	PAEs	Molecular weight	Weightage	Relative weightage	Concentration	EQS (ppb)	Quality Rating	Sub Index	Poland
	DMP	3	0.158333	1.01814	800	0.00127268	0.000201507		DMP	3	0.158333	0.586875	800	0.000733594	0.000116152		DMP	3	0.158333	47.4786	800	5.93482e-05	9.3968e-06		DMP	3	0.158333	5.59458	800	6.99323	1.10726		DMP	3	0.158333	32.4	800	0.0405	0.0064125		DMP	194.18	3	0.158333	361.775	800	56.9407	9.01561
	DEP	3	0.158333	449.199	200	2.24599	0.355616		DEP	3	0.158333	18.5739	200	0.0928693	0.0147043		DEP	3	0.158333	160	200	0.0008	0.000126667		DEP	3	0.158333	4.55917	200	22.7958	3.60934		DEP	3	0.158333	157.967	200	0.789833	0.125057		DEP	222.24	3	0.158333	836.117	200	459.932	72.8225
	DBP	4	0.211111	442.918	5	88.5836	18.701		DBP	4	0.211111	3.44078	5	0.688157	0.145278		DBP	4	0.211111	640	5	0.128	0.0270222		DBP	4	0.211111	39.9606	5	7992.12	1687.23		DBP	4	0.211111	1483.95	5	296.79	62.6558		DBP	278.34	4	0.211111	492.062	5	8644.77	1825.01
	BBP	3	0.158333	4.76293	20	0.238146	0.0377065		BBP	3	0.158333	3.16826	20	0.158413	0.0250821		BBP	3	0.158333		20	0	0		BBP	3	0.158333		20	0	0		BBP	3	0.158333	142.262	20	7.11312	1.12624		BBP	312.4	3	0.158333		20	0	0
	DEHP	5	0.263889	95.2564	20	4.76282	1.25686		DEHP	5	0.263889	31.3283	20	1.56642	0.41336		DEHP	5	0.263889		20	0	0		DEHP	5	0.263889		20	0	0		DEHP	5	0.263889	1456.33	20	72.8165	19.2155		DEHP	390.564	5	0.263889		20	0	0
		18					20.3514			18					0.59854			18					0.0271583			18					1691.94			18					83.1289				18					1906.85
Canada	PAEs	Weightage	Relative weightage	Concentration	EQS (ppb)	Quality Rating	Sub Index	Canada	PAEs	Weightage	Relative weightage	Concentration	EQS (ppb)	Quality Rating	Sub Index	Canada	PAEs	Weightage	Relative weightage	Concentration	EQS (ppb)	Quality Rating	Sub Index	Canada	PAEs	Weightage	Relative weightage	Concentration	EQS (ppb)	Quality Rating	Sub Index	Canada	PAEs	Weightage	Relative weightage	Concentration	EQS (ppb)	Quality Rating	Sub Index	Canada	PAEs	Molecular weight	Weightage	Relative weightage	Concentration	EQS (ppb)	Quality Rating	Sub Index	Canada
	DMP	3	0.158333	1.01814	800	0.00127268	0.000201507		DMP	3	0.158333	0.586875	800	0.000733594	0.000116152		DMP	3	0.158333	47.4786	800	5.93482e-05	9.3968e-06		DMP	3	0.158333	5.59458	800	6.99323	1.10726		DMP	3	0.158333	32.4	800	0.0405	0.0064125		DMP	194.18	3	0.158333	361.775	800	56.9407	9.01561
	DEP	3	0.158333	449.199	200	2.24599	0.355616		DEP	3	0.158333	18.5739	200	0.0928693	0.0147043		DEP	3	0.158333	106.259	200	0.000531295	8.41217e-05		DEP	3	0.158333	4.55917	200	22.7958	3.60934		DEP	3	0.158333	157.967	200	0.789833	0.125057		DEP	222.24	3	0.158333	836.117	200	459.932	72.8225
	DBP	4	0.211111	442.918	5	88.5836	18.701		DBP	4	0.211111	3.44078	5	0.688157	0.145278		DBP	4	0.211111	322.545	5	0.064509	0.0136186		DBP	4	0.211111	215.1	5	43020	9082		DBP	4	0.211111	1483.95	5	296.79	62.6558		DBP	278.34	4	0.211111	492.062	5	8644.77	1825.01
	BBP	3	0.158333	4.76293	20	0.238146	0.0377065		BBP	3	0.158333	3.16826	20	0.158413	0.0250821		BBP	3	0.158333		20	0	0		BBP	3	0.158333		20	0	0		BBP	3	0.158333	142.262	20	7.11312	1.12624		BBP	312.4	3	0.158333		20	0	0
	DEHP	5	0.263889	95.2564	20	4.76282	1.25686		DEHP	5	0.263889	31.3283	20	1.56642	0.41336		DEHP	5	0.263889		20	0	0		DEHP	5	0.263889		20	0	0		DEHP	5	0.263889	1456.33	20	72.8165	19.2155		DEHP	390.564	5	0.263889		20	0	0
		18					20.3514			18					0.59854			18					0.0137121			18					9086.72			18					83.1289				18					1906.85
Morocco	PAEs	Weightage	Relative weightage	Concentration	EQS (ppb)	Quality Rating	Sub Index	Morocco	PAEs	Weightage	Relative weightage	Concentration	EQS (ppb)	Quality Rating	Sub Index	Morocco	PAEs	Weightage	Relative weightage	Concentration	EQS (ppb)	Quality Rating	Sub Index	Morocco	PAEs	Weightage	Relative weightage	Concentration	EQS (ppb)	Quality Rating	Sub Index	Morocco	PAEs	Weightage	Relative weightage	Concentration	EQS (ppb)	Quality Rating	Sub Index	Morocco	PAEs	Molecular weight	Weightage	Relative weightage	Concentration	EQS (ppb)	Quality Rating	Sub Index	Morocco
	DMP	3	0.158333	1.01814	800	0.00127268	0.000201507		DMP	3	0.158333	0.586875	800	0.000733594	0.000116152		DMP	3	0.158333	47.4786	800	5.93482e-05	9.3968e-06		DMP	3	0.158333	0.27	800	0.3375	0.0534375		DMP	3	0.158333	32.4	800	0.0405	0.0064125		DMP	194.18	3	0.158333	361.775	800	56.9407	9.01561
	DEP	3	0.158333	449.199	200	2.24599	0.355616		DEP	3	0.158333	18.5739	200	0.0928693	0.0147043		DEP	3	0.158333	106.259	200	0.000531295	8.41217e-05		DEP	3	0.158333	0	200	0	0		DEP	3	0.158333	157.967	200	0.789833	0.125057		DEP	222.24	3	0.158333	836.117	200	459.932	72.8225
	DBP	4	0.211111	442.918	5	88.5836	18.701		DBP	4	0.211111	3.44078	5	0.688157	0.145278		DBP	4	0.211111	322.545	5	0.064509	0.0136186		DBP	4	0.211111	1.025	5	205	43.2778		DBP	4	0.211111	1483.95	5	296.79	62.6558		DBP	278.34	4	0.211111	492.062	5	8644.77	1825.01
	BBP	3	0.158333	4.76293	20	0.238146	0.0377065		BBP	3	0.158333	3.16826	20	0.158413	0.0250821		BBP	3	0.158333		20	0	0		BBP	3	0.158333		20	0	0		BBP	3	0.158333	142.262	20	7.11312	1.12624		BBP	312.4	3	0.158333		20	0	0
	DEHP	5	0.263889	95.2564	20	4.76282	1.25686		DEHP	5	0.263889	31.3283	20	1.56642	0.41336		DEHP	5	0.263889		20	0	0		DEHP	5	0.263889		20	0	0		DEHP	5	0.263889	1456.33	20	72.8165	19.2155		DEHP	390.564	5	0.263889		20	0	0
		18					20.3514			18					0.59854			18					0.0137121			18					43.3312			18					83.1289				18					1906.85
Spain	PAEs	Weightage	Relative weightage	Concentration	EQS (ppb)	Quality Rating	Sub Index	Spain	PAEs	Weightage	Relative weightage	Concentration	EQS (ppb)	Quality Rating	Sub Index	Spain	PAEs	Weightage	Relative weightage	Concentration	EQS (ppb)	Quality Rating	Sub Index	Spain	PAEs	Weightage	Relative weightage	Concentration	EQS (ppb)	Quality Rating	Sub Index	Spain	PAEs	Weightage	Relative weightage	Concentration	EQS (ppb)		Sub Index	Spain	PAEs	Molecular weight	Weightage	Relative weightage	Concentration	EQS (ppb)	Quality Rating	Sub Index	Spain
	DMP	3	0.158333	1.01814	800	0.00127268	0.000201507		DMP	3	0.158333	0.586875	800	0.000733594	0.000116152		DMP	3	0.158333	47.4786	800	5.93482e-05	9.3968e-06		DMP	3	0.158333	5.59458	800	6.99323	1.10726		DMP	3	0.158333	32.4	800	0.0405	0.0064125		DMP	194.18	3	0.158333	15	800	2.36089	0.373807
	DEP	3	0.158333	449.199	200	2.24599	0.355616		DEP	3	0.158333	18.5739	200	0.0928693	0.0147043		DEP	3	0.158333	106.259	200	0.000531295	8.41217e-05		DEP	3	0.158333	4.55917	200	22.7958	3.60934		DEP	3	0.158333	157.967	200	0.789833	0.125057		DEP	222.24	3	0.158333	836.117	200	459.932	72.8225
	DBP	4	0.211111	442.918	5	88.5836	18.701		DBP	4	0.211111	3.44078	5	0.688157	0.145278		DBP	4	0.211111	322.545	5	0.064509	0.0136186		DBP	4	0.211111	39.9606	5	7992.12	1687.23		DBP	4	0.211111	1483.95	5	296.79	62.6558		DBP	278.34	4	0.211111	492.062	5	8644.77	1825.01
	BBP	3	0.158333	4.76293	20	0.238146	0.0377065		BBP	3	0.158333	3.16826	20	0.158413	0.0250821		BBP	3	0.158333		20	0	0		BBP	3	0.158333		20	0	0		BBP	3	0.158333	142.262	20	7.11312	1.12624		BBP	312.4	3	0.158333		20	0	0
	DEHP	5	0.263889	95.2564	20	4.76282	1.25686		DEHP	5	0.263889	31.3283	20	1.56642	0.41336		DEHP	5	0.263889		20	0	0		DEHP	5	0.263889		20	0	0		DEHP	5	0.263889	1456.33	20	72.8165	19.2155		DEHP	390.564	5	0.263889		20	0	0
		18					20.3514			18					0.59854			18					0.0137121			18					1691.94			18					83.1289				18					1898.2
Sweden	PAEs	Weightage	Relative weightage	Concentration	EQS (ppb)	Quality Rating	Sub Index	Sweden	PAEs	Weightage	Relative weightage	Concentration	EQS (ppb)	Quality Rating	Sub Index	Sweden	PAEs	Weightage	Relative weightage	Concentration	EQS (ppb)	Quality Rating	Sub Index	Sweden	PAEs	Weightage	Relative weightage	Concentration	EQS (ppb)	Quality Rating	Sub Index	Sweden	PAEs	Weightage	Relative weightage	Concentration	EQS (ppb)		Sub Index	Sweden	PAEs	Molecular weight	Weightage	Relative weightage	Concentration	EQS (ppb)	Quality Rating	Sub Index	Sweden
	DMP	3	0.158333	1.01814	800	0.00127268	0.000201507		DMP	3	0.158333	0.586875	800	0.000733594	0.000116152		DMP	3	0.158333	47.4786	800	5.93482e-05	9.3968e-06		DMP	3	0.158333	5.59458	800	6.99323	1.10726		DMP	3	0.158333	32.4	800	0.0405	0.0064125		DMP	194.18	3	0.158333	12.1	800	1.90445	0.301538
	DEP	3	0.158333	449.199	200	2.24599	0.355616		DEP	3	0.158333	18.5739	200	0.0928693	0.0147043		DEP	3	0.158333	106.259	200	0.000531295	8.41217e-05		DEP	3	0.158333	4.55917	200	22.7958	3.60934		DEP	3	0.158333	157.967	200	0.789833	0.125057		DEP	222.24	3	0.158333	949.533	200	522.32	82.7007
	DBP	4	0.211111	442.918	5	88.5836	18.701		DBP	4	0.211111	3.44078	5	0.688157	0.145278		DBP	4	0.211111	322.545	5	0.064509	0.0136186		DBP	4	0.211111	39.9606	5	7992.12	1687.23		DBP	4	0.211111	1483.95	5	296.79	62.6558		DBP	278.34	4	0.211111	639	5	11226.2	2369.98
	BBP	3	0.158333	4.76293	20	0.238146	0.0377065		BBP	3	0.158333	3.16826	20	0.158413	0.0250821		BBP	3	0.158333		20	0	0		BBP	3	0.158333		20	0	0		BBP	3	0.158333	142.262	20	7.11312	1.12624		BBP	312.4	3	0.158333		20	0	0
	DEHP	5	0.263889	95.2564	20	4.76282	1.25686		DEHP	5	0.263889	31.3283	20	1.56642	0.41336		DEHP	5	0.263889		20	0	0		DEHP	5	0.263889		20	0	0		DEHP	5	0.263889	1456.33	20	72.8165	19.2155		DEHP	390.564	5	0.263889		20	0	0
		18					20.3514			18					0.59854			18					0.0137121			18					1691.94			18					83.1289				18					2452.98
Belgium	PAEs	Weightage	Relative weightage	Concentration	EQS (ppb)	Quality Rating	Sub Index	Belgium	PAEs	Weightage	Relative weightage	Concentration	EQS (ppb)	Quality Rating	Sub Index	Belgium	PAEs	Weightage	Relative weightage	Concentration	EQS (ppb)	Quality Rating	Sub Index	Belgium	PAEs	Weightage	Relative weightage	Concentration	EQS (ppb)	Quality Rating	Sub Index	Belgium	PAEs	Weightage	Relative weightage	Concentration	EQS (ppb)		Sub Index	Belgium	PAEs	Molecular weight	Weightage	Relative weightage	Concentration	EQS (ppb)	Quality Rating	Sub Index	Belgium
	DMP	3	0.158333	1.01814	800	0.00127268	0.000201507		DMP	3	0.158333	0.586875	800	0.000733594	0.000116152		DMP	3	0.158333	47.4786	800	5.93482e-05	9.3968e-06		DMP	3	0.158333	5.59458	800	6.99323	1.10726		DMP	3	0.158333	32.4	800	0.0405	0.0064125		DMP	194.18	3	0.158333	361.775	800	56.9407	9.01561
	DEP	3	0.158333	449.199	200	2.24599	0.355616		DEP	3	0.158333	18.5739	200	0.0928693	0.0147043		DEP	3	0.158333	106.259	200	0.000531295	8.41217e-05		DEP	3	0.158333	4.55917	200	22.7958	3.60934		DEP	3	0.158333	157.967	200	0.789833	0.125057		DEP	222.24	3	0.158333	836.117	200	459.932	72.8225
	DBP	4	0.211111	442.918	5	88.5836	18.701		DBP	4	0.211111	3.44078	5	0.688157	0.145278		DBP	4	0.211111	322.545	5	0.064509	0.0136186		DBP	4	0.211111	39.9606	5	7992.12	1687.23		DBP	4	0.211111	1483.95	5	296.79	62.6558		DBP	278.34	4	0.211111	492.062	5	8644.77	1825.01
	BBP	3	0.158333	4.76293	20	0.238146	0.0377065		BBP	3	0.158333	3.16826	20	0.158413	0.0250821		BBP	3	0.158333		20	0	0		BBP	3	0.158333		20	0	0		BBP	3	0.158333	142.262	20	7.11312	1.12624		BBP	312.4	3	0.158333		20	0	0
	DEHP	5	0.263889	95.2564	20	4.76282	1.25686		DEHP	5	0.263889	31.3283	20	1.56642	0.41336		DEHP	5	0.263889		20	0	0		DEHP	5	0.263889		20	0	0		DEHP	5	0.263889	1456.33	20	72.8165	19.2155		DEHP	390.564	5	0.263889		20	0	0
		18					20.3514			18					0.59854			18					0.0137121			18					1691.94			18					83.1289				18					1906.85
Slovakia	PAEs	Weightage	Relative weightage	Concentration	EQS (ppb)	Quality Rating	Sub Index	Slovakia	PAEs	Weightage	Relative weightage	Concentration	EQS (ppb)	Quality Rating	Sub Index	Slovakia	PAEs	Weightage	Relative weightage	Concentration	EQS (ppb)	Quality Rating	Sub Index	Slovakia	PAEs	Weightage	Relative weightage	Concentration	EQS (ppb)	Quality Rating	Sub Index	Slovakia	PAEs	Weightage	Relative weightage	Concentration	EQS (ppb)		Sub Index	Slovakia	PAEs	Molecular weight	Weightage	Relative weightage	Concentration	EQS (ppb)	Quality Rating	Sub Index	Slovakia
	DMP	3	0.158333	1.01814	800	0.00127268	0.000201507		DMP	3	0.158333	0.586875	800	0.000733594	0.000116152		DMP	3	0.158333	47.4786	800	5.93482e-05	9.3968e-06		DMP	3	0.158333	5.59458	800	6.99323	1.10726		DMP	3	0.158333	32.4	800	0.0405	0.0064125		DMP	194.18	3	0.158333	361.775	800	56.9407	9.01561
	DEP	3	0.158333	449.199	200	2.24599	0.355616		DEP	3	0.158333	18.5739	200	0.0928693	0.0147043		DEP	3	0.158333	106.259	200	0.000531295	8.41217e-05		DEP	3	0.158333	4.55917	200	22.7958	3.60934		DEP	3	0.158333	157.967	200	0.789833	0.125057		DEP	222.24	3	0.158333	836.117	200	459.932	72.8225
	DBP	4	0.211111	442.918	5	88.5836	18.701		DBP	4	0.211111	3.44078	5	0.688157	0.145278		DBP	4	0.211111	322.545	5	0.064509	0.0136186		DBP	4	0.211111	39.9606	5	7992.12	1687.23		DBP	4	0.211111	1483.95	5	296.79	62.6558		DBP	278.34	4	0.211111	492.062	5	8644.77	1825.01
	BBP	3	0.158333	4.76293	20	0.238146	0.0377065		BBP	3	0.158333	3.16826	20	0.158413	0.0250821		BBP	3	0.158333		20	0	0		BBP	3	0.158333		20	0	0		BBP	3	0.158333	142.262	20	7.11312	1.12624		BBP	312.4	3	0.158333		20	0	0
	DEHP	5	0.263889	95.2564	20	4.76282	1.25686		DEHP	5	0.263889	31.3283	20	1.56642	0.41336		DEHP	5	0.263889		20	0	0		DEHP	5	0.263889		20	0	0		DEHP	5	0.263889	1456.33	20	72.8165	19.2155		DEHP	390.564	5	0.263889		20	0	0
		18					20.3514			18					0.59854			18					0.0137121			18					1691.94			18					83.1289				18					1906.85
USA	PAEs	Weightage	Relative weightage	Concentration	EQS (ppb)	Quality Rating	Sub Index	USA	PAEs	Weightage	Relative weightage	Concentration	EQS (ppb)	Quality Rating	Sub Index	USA	PAEs	Weightage	Relative weightage	Concentration	EQS (ppb)	Quality Rating	Sub Index	USA	PAEs	Weightage	Relative weightage	Concentration	EQS (ppb)	Quality Rating	Sub Index	USA	PAEs	Weightage	Relative weightage	Concentration	EQS (ppb)		Sub Index	USA	PAEs	Molecular weight	Weightage	Relative weightage	Concentration	EQS (ppb)	Quality Rating	Sub Index	USA
	DMP	3	0.158333	1.01814	800	0.00127268	0.000201507		DMP	3	0.158333	0.586875	800	0.000733594	0.000116152		DMP	3	0.158333	47.4786	800	5.93482e-05	9.3968e-06		DMP	3	0.158333	5.59458	800	6.99323	1.10726		DMP	3	0.158333	32.4	800	0.0405	0.0064125		DMP	194.18	3	0.158333	361.775	800	56.9407	9.01561
	DEP	3	0.158333	449.199	200	2.24599	0.355616		DEP	3	0.158333	18.5739	200	0.0928693	0.0147043		DEP	3	0.158333	106.259	200	0.000531295	8.41217e-05		DEP	3	0.158333	4.55917	200	22.7958	3.60934		DEP	3	0.158333	157.967	200	0.789833	0.125057		DEP	222.24	3	0.158333	836.117	200	459.932	72.8225
	DBP	4	0.211111	442.918	5	88.5836	18.701		DBP	4	0.211111	3.44078	5	0.688157	0.145278		DBP	4	0.211111	322.545	5	0.064509	0.0136186		DBP	4	0.211111	39.9606	5	7992.12	1687.23		DBP	4	0.211111	1483.95	5	296.79	62.6558		DBP	278.34	4	0.211111	492.062	5	8644.77	1825.01
	BBP	3	0.158333	4.76293	20	0.238146	0.0377065		BBP	3	0.158333	3.16826	20	0.158413	0.0250821		BBP	3	0.158333		20	0	0		BBP	3	0.158333		20	0	0		BBP	3	0.158333	142.262	20	7.11312	1.12624		BBP	312.4	3	0.158333		20	0	0
	DEHP	5	0.263889	95.2564	20	4.76282	1.25686		DEHP	5	0.263889	31.3283	20	1.56642	0.41336		DEHP	5	0.263889		20	0	0		DEHP	5	0.263889		20	0	0		DEHP	5	0.263889	1456.33	20	72.8165	19.2155		DEHP	390.564	5	0.263889		20	0	0
		18					20.3514			18					0.59854			18					0.0137121			18					1691.94			18					83.1289				18					1906.85
South Korea	PAEs	Weightage	Relative weightage	Concentration	EQS (ppb)	Quality Rating	Sub Index	South Korea	PAEs	Weightage	Relative weightage	Concentration	EQS (ppb)	Quality Rating	Sub Index	South Korea	PAEs	Weightage	Relative weightage	Concentration	EQS (ppb)	Quality Rating	Sub Index	South Korea	PAEs	Weightage	Relative weightage	Concentration	EQS (ppb)	Quality Rating	Sub Index	South Korea	PAEs	Weightage	Relative weightage	Concentration	EQS (ppb)	Quality Rating	Sub Index	South Korea	PAEs	Molecular weight	Weightage	Relative weightage	Concentration	EQS (ppb)	Quality Rating	Sub Index	South Korea
	DMP	3	0.158333	1.01814	800	0.00127268	0.000201507		DMP	3	0.158333	0.586875	800	0.000733594	0.000116152		DMP	3	0.158333	47.4786	800	5.93482e-05	9.3968e-06		DMP	3	0.158333	5.59458	800	6.99323	1.10726		DMP	3	0.158333	32.4	800	0.0405	0.0064125		DMP	194.18	3	0.158333	361.775	800	56.9407	9.01561
	DEP	3	0.158333	449.199	200	2.24599	0.355616		DEP	3	0.158333	18.5739	200	0.0928693	0.0147043		DEP	3	0.158333	106.259	200	0.000531295	8.41217e-05		DEP	3	0.158333	4.55917	200	22.7958	3.60934		DEP	3	0.158333	157.967	200	0.789833	0.125057		DEP	222.24	3	0.158333	836.117	200	459.932	72.8225
	DBP	4	0.211111	442.918	5	88.5836	18.701		DBP	4	0.211111	3.44078	5	0.688157	0.145278		DBP	4	0.211111	322.545	5	0.064509	0.0136186		DBP	4	0.211111	39.9606	5	7992.12	1687.23		DBP	4	0.211111	1483.95	5	296.79	62.6558		DBP	278.34	4	0.211111	492.062	5	8644.77	1825.01
	BBP	3	0.158333	4.76293	20	0.238146	0.0377065		BBP	3	0.158333	3.16826	20	0.158413	0.0250821		BBP	3	0.158333		20	0	0		BBP	3	0.158333		20	0	0		BBP	3	0.158333	142.262	20	7.11312	1.12624		BBP	312.4	3	0.158333		20	0	0
	DEHP	5	0.263889	95.2564	20	4.76282	1.25686		DEHP	5	0.263889	31.3283	20	1.56642	0.41336		DEHP	5	0.263889		20	0	0		DEHP	5	0.263889		20	0	0		DEHP	5	0.263889	1456.33	20	72.8165	19.2155		DEHP	390.564	5	0.263889		20	0	0
		18					20.3514			18					0.59854			18					0.0137121			18					1691.94			18					83.1289				18					1906.85
Hong-Kong	PAEs	Weightage	Relative weightage	Concentration	EQS (ppb)	Quality Rating	Sub Index	Hong-Kong	PAEs	Weightage	Relative weightage	Concentration	EQS (ppb)	Quality Rating	Sub Index	Hong-Kong	PAEs	Weightage	Relative weightage	Concentration	EQS (ppb)	Quality Rating	Sub Index	Hong-Kong	PAEs	Weightage	Relative weightage	Concentration	EQS (ppb)	Quality Rating	Sub Index	Hong-Kong	PAEs	Weightage	Relative weightage	Concentration	EQS (ppb)	Quality Rating	Sub Index	Hong-Kong	PAEs	Molecular weight	Weightage	Relative weightage	Concentration	EQS (ppb)	Quality Rating	Sub Index	Hong-Kong
	DMP	3	0.158333	1.01814	800	0.00127268	0.000201507		DMP	3	0.158333	0.586875	800	0.000733594	0.000116152		DMP	3	0.158333	47.4786	800	5.93482e-05	9.3968e-06		DMP	3	0.158333	5.59458	800	6.99323	1.10726		DMP	3	0.158333	32.4	800	0.0405	0.0064125		DMP	194.18	3	0.158333	361.775	800	56.9407	9.01561
	DEP	3	0.158333	449.199	200	2.24599	0.355616		DEP	3	0.158333	18.5739	200	0.0928693	0.0147043		DEP	3	0.158333	106.259	200	0.000531295	8.41217e-05		DEP	3	0.158333	4.55917	200	22.7958	3.60934		DEP	3	0.158333	157.967	200	0.789833	0.125057		DEP	222.24	3	0.158333	836.117	200	459.932	72.8225
	DBP	4	0.211111	442.918	5	88.5836	18.701		DBP	4	0.211111	3.44078	5	0.688157	0.145278		DBP	4	0.211111	322.545	5	0.064509	0.0136186		DBP	4	0.211111	39.9606	5	7992.12	1687.23		DBP	4	0.211111	1483.95	5	296.79	62.6558		DBP	278.34	4	0.211111	492.062	5	8644.77	1825.01
	BBP	3	0.158333	4.76293	20	0.238146	0.0377065		BBP	3	0.158333	3.16826	20	0.158413	0.0250821		BBP	3	0.158333		20	0	0		BBP	3	0.158333		20	0	0		BBP	3	0.158333	142.262	20	7.11312	1.12624		BBP	312.4	3	0.158333		20	0	0
	DEHP	5	0.263889	95.2564	20	4.76282	1.25686		DEHP	5	0.263889	31.3283	20	1.56642	0.41336		DEHP	5	0.263889		20	0	0		DEHP	5	0.263889		20	0	0		DEHP	5	0.263889	1456.33	20	72.8165	19.2155		DEHP	390.564	5	0.263889		20	0	0
		18					20.3514			18					0.59854			18					0.0137121			18					1691.94			18					83.1289				18					1906.85
World	PAEs	Weightage	Relative weightage	Concentration	EQS (ppb)	Quality Rating	Sub Index	World	PAEs	Weightage	Relative weightage	Concentration	EQS (ppb)	Quality Rating	Sub Index	World	PAEs	Weightage	Relative weightage	Concentration	EQS (ppb)	Quality Rating	Sub Index	World	PAEs	Weightage	Relative weightage	Concentration	EQS (ppb)	Quality Rating	Sub Index	World	PAEs	Weightage	Relative weightage	Concentration	EQS (ppb)	Quality Rating	Sub Index	World	PAEs	Molecular weight	Weightage	Relative weightage	Concentration	EQS (ppb)	Quality Rating	Sub Index	World
	DMP	3	0.158333	1.01814	800	0.00127268	0.000201507		DMP	3	0.158333	0.586875	800	0.000733594	0.000116152		DMP	3	0.158333	47.4786	800	5.93482e-05	9.3968e-06		DMP	3	0.158333	5.59458	800	6.99323	1.10726		DMP	3	0.158333	32.4	800	0.0405	0.0064125		DMP	194.18	3	0.158333	361.775	800	56.9407	9.01561
	DEP	3	0.158333	449.199	200	2.24599	0.355616		DEP	3	0.158333	18.5739	200	0.0928693	0.0147043		DEP	3	0.158333	106.259	200	0.000531295	8.41217e-05		DEP	3	0.158333	4.55917	200	22.7958	3.60934		DEP	3	0.158333	157.967	200	0.789833	0.125057		DEP	222.24	3	0.158333	836.117	200	459.932	72.8225
	DBP	4	0.211111	442.918	5	88.5836	18.701		DBP	4	0.211111	3.44078	5	0.688157	0.145278		DBP	4	0.211111	322.545	5	0.064509	0.0136186		DBP	4	0.211111	39.9606	5	7992.12	1687.23		DBP	4	0.211111	1483.95	5	296.79	62.6558		DBP	278.34	4	0.211111	492.062	5	8644.77	1825.01
	BBP	3	0.158333	4.76293	20	0.238146	0.0377065		BBP	3	0.158333	3.16826	20	0.158413	0.0250821		BBP	3	0.158333		20	0	0		BBP	3	0.158333		20	0	0		BBP	3	0.158333	142.262	20	7.11312	1.12624		BBP	312.4	3	0.158333		20	0	0
	DEHP	5	0.263889	95.2564	20	4.76282	1.25686		DEHP	5	0.263889	31.3283	20	1.56642	0.41336		DEHP	5	0.263889		20	0	0		DEHP	5	0.263889		20	0	0		DEHP	5	0.263889	1456.33	20	72.8165	19.2155		DEHP	390.564	5	0.263889		20	0	0
		18					20.3514			18					0.59854			18					0.0137121			18					1691.94			18					83.1289				18					1906.85
[truncated: 40 more columns]
